# Supplementary material
Source: publisher figshare collection journal article supplement (https://acs.figshare.com/ndownloader/files/3761569)
Supplement: Supplementary file 1 [file 3761569]

## **Knölker-Type Iron Complexes Bearing an N-Heterocyclic Carbene Ligand: Synthesis, Characterization, and Catalytic Dehydration of Primary Amides**

Saravanakumar Elangovan,<sup>a</sup> Samuel Quintero-Duque,<sup>a</sup> Vincent Dorcet,<sup>b</sup> Thierry Roisnel,<sup>b</sup> Lucie Norel,<sup>a</sup> Christophe Darcel,<sup>a\*</sup> Jean-Baptiste Sortais<sup>a\*</sup>

<sup>a</sup> UMR 6226 CNRS-Université de Rennes 1, Institut des Sciences Chimiques de Rennes, Team Organometallics: Materials and Catalysis, Centre for Catalysis and Green Chemistry, Campus de Beaulieu, 263 av. du Général Leclerc, 35042 Rennes Cedex, France.

<sup>b</sup> Institut des Sciences Chimiques de Rennes, UMR 6226 CNRS-Université de Rennes 1, Centre de Diffractométrie X, Campus de Beaulieu, 263 av. du Général Leclerc, 35042 Rennes Cedex, France.

E-mail: [christophe.darcel@univ-rennes1.fr](mailto:christophe.darcel@univ-rennes1.fr), [jean-baptiste.sortais@univ-rennes1.fr](mailto:jean-baptiste.sortais@univ-rennes1.fr)

## *Table of Contents.*

|                                                                                                  |     |
|--------------------------------------------------------------------------------------------------|-----|
| Synthesis of 1-mesityl-3-(( <i>R</i> )-1-phenylethyl)imidazolium chloride salt.....              | S3  |
| Electrochemical studies .....                                                                    | S3  |
| Dehydration of primary amides .....                                                              | S4  |
| 1. General procedure for the dehydration of the primary amides .....                             | S4  |
| 2. Optimization of the parameters of the reaction. ....                                          | S4  |
| 3. Characterization data of the nitrile products.....                                            | S6  |
| References .....                                                                                 | S8  |
| <sup>1</sup> H NMR and <sup>13</sup> C{ <sup>1</sup> H} NMR data for the compounds .....         | S9  |
| <sup>1</sup> H and <sup>13</sup> C{ <sup>1</sup> H} Spectra of the new NHC salt .....            | S9  |
| <sup>1</sup> H and <sup>13</sup> C{ <sup>1</sup> H} Spectra of the complexes 2-7 .....           | S11 |
| <sup>1</sup> H and <sup>13</sup> C{ <sup>1</sup> H} Spectra of the benzonitrile derivatives..... | S22 |

## Synthesis of 1-mesityl-3-((*R*)-1-phenylethyl)imidazolium chloride salt

The imidazolium salt was prepared following the procedure described by Baslé and Maudit,<sup>1</sup> starting from *R*-(+)- $\alpha$ -methylbenzylamine (1.41 mL, 10 mmol). Pure compound was obtained after purification by column chromatography on silica gel (CH<sub>2</sub>Cl<sub>2</sub>/MeOH, 9/1 as the eluant). 900 mg, yield 28%.

<sup>1</sup>H NMR (400 MHz, CDCl<sub>3</sub>)  $\delta$  10.86 (s, 1H), 7.85 (s, 1H), 7.61 (d,  $J$  = 6.5 Hz, 2H), 7.36-7.29 (m, 3H), 7.19 (s, 1H), 6.92 (s, 1H, CH<sub>Im</sub>), 6.91 (s, 1H, CH<sub>Im</sub>), 6.67 (q,  $J$  = 7.0 Hz, 1H), 2.27 (s, 3H, CH<sub>3Mes</sub>), 2.03 (s, 3H, CH<sub>3Mes</sub>), 2.02 (d,  $J$  = 7.0 Hz, 3H), 1.95 (s, 3H, CH<sub>3Mes</sub>).

<sup>13</sup>C{<sup>1</sup>H} NMR (101 MHz, CDCl<sub>3</sub>)  $\delta$  140.9, 138.1, 137.8, 134.0, 133.9, 130.7, 129.6, 129.2, 129.0, 127.1, 123.4, 120.9, 59.1 (CH), 20.9 (CH<sub>3Mes</sub>), 20.6 (CH<sub>3</sub>), 17.5 (CH<sub>3Mes</sub>), 17.4 (CH<sub>3</sub>).

Anal. calc for C<sub>20</sub>H<sub>23</sub>N<sub>2</sub>Cl: C, 73.49; H, 7.09; N, 8.57. Found: C, 73.31; H, 7.02; N, 8.32.

## Electrochemical studies

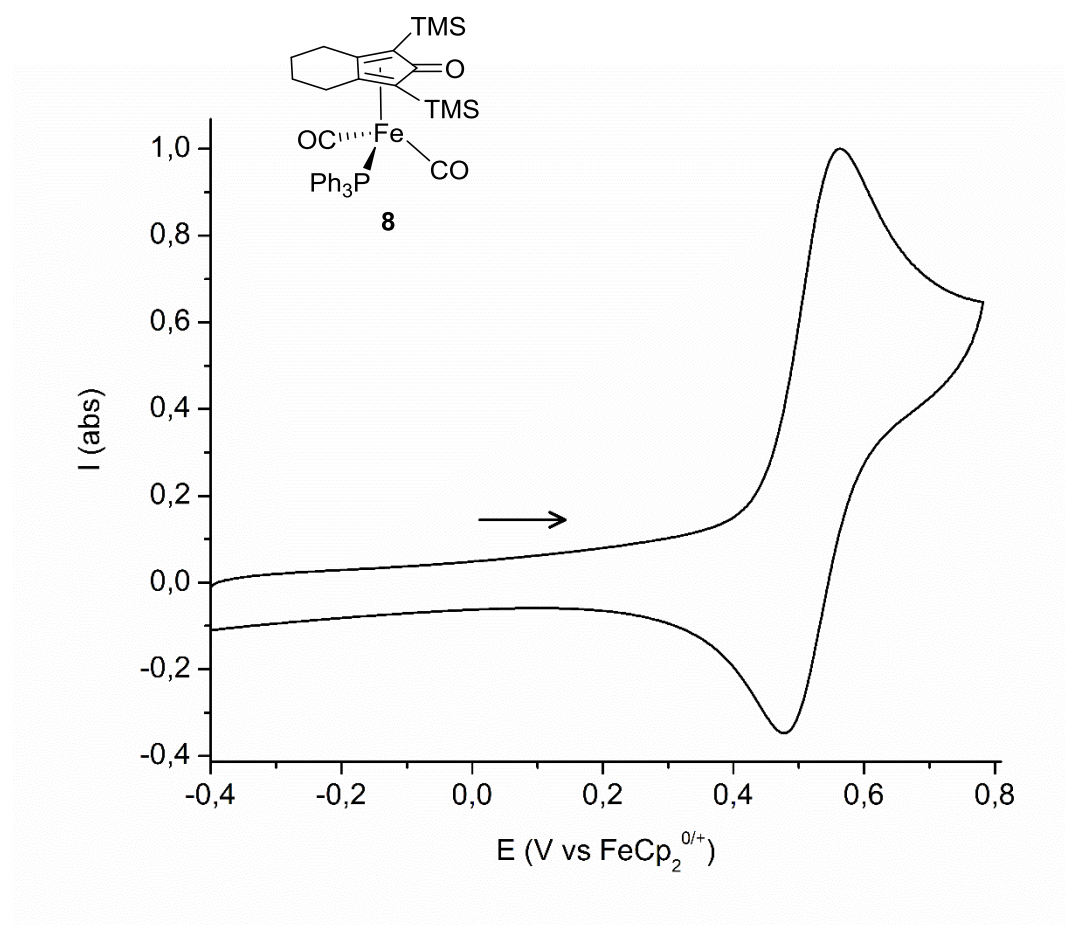

**Figure S1.** Normalized CV traces of the complex **8** in CH<sub>2</sub>Cl<sub>2</sub> (0.2 M Bu<sub>4</sub>NPF<sub>6</sub>,  $\nu$  = 100 mV·s<sup>-1</sup>).

## Dehydration of primary amides

### 1. General procedure for the dehydration of the primary amides

A Schlenk tube containing a stirring bar was loaded with the primary amide (1.0 mmol), followed by the addition of the iron complex (0.05-0.08 mmol), the solvent (dry toluene or 1,4-dioxane : THF, 4 mL) and finally PMHS (5.0 mmol). The mixture was stirred for 24 h at 100 °C. After completion of reaction, the reaction mixture was cooled to r.t. The cooled reaction mixture was diluted with ethyl acetate (5 mL) and concentrated under reduced pressure (850 mbar, 40 °C). The residue was purified by silica gel column chromatography and gave the corresponding nitrile derivatives.

### 2. Optimization of the parameters of the reaction.

**Table S1: Optimization of parameters of the dehydration of benzamide with the complex 2<sup>a</sup>**

| <i>Entry</i>   | <i>PMHS<br/>(equiv.)</i> | <i>Solvent</i> | <i>Temp (°C)</i> | <i>Yield (%)<sup>b</sup></i> |
|----------------|--------------------------|----------------|------------------|------------------------------|
| 1              | 5                        | Toluene        | 100              | 97                           |
| 2              | 5                        | CPME           | 100              | 97                           |
| 3              | 5                        | 1,4 dioxane    | 100              | 94                           |
| 4              | 5                        | THF            | 70               | 13                           |
| 5              | 5                        | DMC            | 100              | 0                            |
| 6              | 5                        | EtOH           | 100              | 0                            |
| 7              | 5                        | Toluene        | 70               | 12                           |
| 8 <sup>c</sup> | 5                        | CPME           | 100              | 51                           |
| 9              | 3                        | CPME           | 100              | 87                           |
| 10             | 2                        | CPME           | 100              | 35                           |
| 11             | 5                        | CPME           | UV               | 6                            |

<sup>a</sup> Typical conditions: catalyst (5 mol%), benzamide (0.25 mmol), toluene (2 mL), and PMHS (5 equiv.) were added in this order under argon atmosphere and the solution was heated at 100 °C for 24 h. <sup>b</sup> Determined by GC using dodecane as the internal standard. <sup>c</sup> 3 mol% of catalyst **2** was used.

**Table S2: Screening of the complexes<sup>a</sup>**

| <i>Entry</i> | <i>Catalyst</i><br>(5 mol%) | <i>PMHS</i><br>(equiv.) | <i>Solvent</i> | <i>Temp (°C)</i> | <i>Yield(%)<sup>b</sup></i> |
|--------------|-----------------------------|-------------------------|----------------|------------------|-----------------------------|
| 1            | 2                           | 3                       | CPME           | 80               | 18                          |
|              |                             | 5                       | toluene        | 100              | 97                          |
| 2            | 3                           | 3                       | CPME           | 80               | 24                          |
|              |                             | 5                       | toluene        | 100              | 97                          |
| 3            | 4                           | 3                       | CPME           | 80               | 29                          |
|              |                             | 5                       | toluene        | 100              | 97                          |
| 4            | 5                           | 3                       | CPME           | 80               | 0                           |
|              |                             | 5                       | toluene        | 100              | 97                          |
| 5            | 6                           | 3                       | CPME           | 80               | 0                           |
|              |                             | 5                       | toluene        | 100              | 97                          |
| 6            | <b>1</b>                    | 5                       | toluene        | 100              | 2                           |
| 7            | (IMes) Fe(CO) <sub>4</sub>  | 5                       | toluene        | 100              | 57                          |

<sup>a</sup> catalyst (5 mol%), benzamide (0.25 mmol), solvent (2 mL), and PMHS (3-5 equiv.) were added in this order under argon atmosphere and the solution was heated to 80-100 °C for 24 h.

<sup>b</sup> Determined by GC using dodecane as the internal standard.

### 3. Characterization data of the nitrile products.

#### Benzonitrile <sup>2</sup>

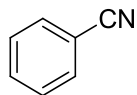

The compound was prepared as described in the general procedure. Purification by flash chromatography (Petroleum ether/ethyl acetate: 80:20), colorless oil, 75 mg, 72% isolated yield.

<sup>1</sup>H NMR (400 MHz, CDCl<sub>3</sub>): δ 7.47 (t, *J* = 7.7 Hz, 2H), 7.60 (t, *J* = 7.6 Hz, 1H), 7.65 (d, *J* = 7.7 Hz, 2H).

<sup>13</sup>C{<sup>1</sup>H} NMR (100 MHz, CDCl<sub>3</sub>): δ 112.4, 118.8, 129.0, 132.1, 132.7.

#### 4-Methylbenzonitrile <sup>2</sup>

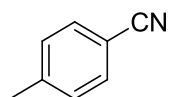

The compound was prepared as described in the general procedure. Purification by flash chromatography (Petroleum ether/ethyl acetate: 80:20), colorless oil, 98 mg, 84% isolated yield.

<sup>1</sup>H NMR (400 MHz, CDCl<sub>3</sub>): δ 2.40 (s, 3H), 7.25 (d, *J* = 8.1 Hz, 2H), 7.51 (d, *J* = 8.1 Hz, 2H).

<sup>13</sup>C{<sup>1</sup>H} NMR (100 MHz, CDCl<sub>3</sub>): δ 21.7, 109.1, 119.0, 129.7, 131.9, 143.6.

#### 3-Methylbenzonitrile <sup>3</sup>

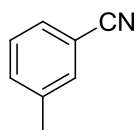

The compound was prepared as described in the general procedure. Purification by flash chromatography (Petroleum ether/ethyl acetate: 80:20), colorless oil, 90 mg, 77% isolated yield.

<sup>1</sup>H NMR (400 MHz, CDCl<sub>3</sub>): δ 2.39 (s, 3H), 7.32-7.46 (m, 4H).

<sup>13</sup>C{<sup>1</sup>H} NMR (100 MHz, CDCl<sub>3</sub>): δ 21.1, 112.2, 119.0, 128.9, 129.2, 132.5, 133.6, 139.2.

## 2-Methylbenzonitrile <sup>2</sup>

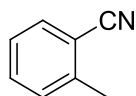

The compound was prepared as described in the general procedure. Purification by flash chromatography (Petroleum ether/ethyl acetate: 80:20), colorless oil, 85 mg, 72% isolated yield.

<sup>1</sup>H NMR (400 MHz, CDCl<sub>3</sub>): δ 2.55 (s, 3 H), 7.26 (t, *J* = 7.6 Hz, 1H), 7.31 (d, *J* = 7.8 Hz, 1H), 7.48 (t, *J* = 7.7 Hz, 1H), 7.59 (d, *J* = 7.7 Hz, 1H).

<sup>13</sup>C{<sup>1</sup>H} NMR (75 MHz, CDCl<sub>3</sub>): δ 20.4, 112.8, 118.0, 126.2, 130.2, 132.5, 132.6, 141.9.

## 4-Bromobenzonitrile <sup>3</sup>

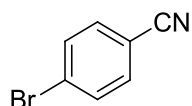

The compound was prepared as described in the general procedure. Purification by flash chromatography (Petroleum ether/ethyl acetate: 80:20), white powder, 96 mg, 53% isolated yield.

<sup>1</sup>H NMR (400 MHz, CDCl<sub>3</sub>): δ 7.53 (d, *J* = 8.5 Hz, 2H), 7.64 (d, *J* = 8.5 Hz, 2H).

<sup>13</sup>C{<sup>1</sup>H} NMR (75 MHz, CDCl<sub>3</sub>): δ 111.2, 118.0, 127.9, 132.6, 133.4.

## *p*-Chlorobenzonitrile <sup>2</sup>

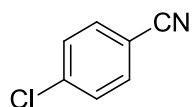

The compound was prepared as described in the general procedure. Purification by flash chromatography (Petroleum ether/ethyl acetate: 80:20), white powder, 71 mg, 52% isolated yield.

<sup>1</sup>H NMR (400 MHz, CDCl<sub>3</sub>): δ 7.47 (d, *J* = 8.6 Hz, 2 H), 7.60 (d, *J* = 8.6 Hz, 2 H).

<sup>13</sup>C{<sup>1</sup>H} NMR (100 MHz, CDCl<sub>3</sub>): δ 110.8, 118.0, 129.7, 133.3, 139.5.

### Cinnamonnitrile <sup>3</sup>

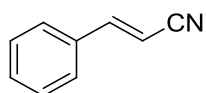

The compound was prepared as described in the general procedure. Purification by flash chromatography (Petroleum ether/ethyl acetate: 80:20), white powder, 80 mg, 61% isolated yield.

<sup>1</sup>H NMR (400 MHz, CDCl<sub>3</sub>): δ 5.89 (d, *J* = 16.7 Hz, 1H), 7.39-7.46 (m, 6H).

<sup>13</sup>C{<sup>1</sup>H} NMR (100 MHz, CDCl<sub>3</sub>): δ 96.3, 118.1, 127.3, 129.1, 131.2, 133.5, 150.5.

### References

1. Queval, P.; Jahier, C.; Rouen, M. ; Artur, I. ; Legeay, J.-C. ; Falivene, L. ; Toupet, L. ; Crévisy, C. ; Baslé, O. ; Maudit M. *Angew. Chem. Int. Ed.* **2013**, 52, 14103-14107.
2. Hanada, S.; Motoyama, Y.; Nagashima, H. *Eur. J. Org. Chem.*, **2008**, 4097-4100.
3. Zhou, S.; Addis, D.; Das, S.; Junge, K.; Beller, M.; *Chem. Commun.* **2009**, 4883-4885.



## $^1\text{H}$ NMR and $^{13}\text{C}\{^1\text{H}\}$ NMR data for the compounds

### $^1\text{H}$ and $^{13}\text{C}\{^1\text{H}\}$ Spectra of the new NHC salt

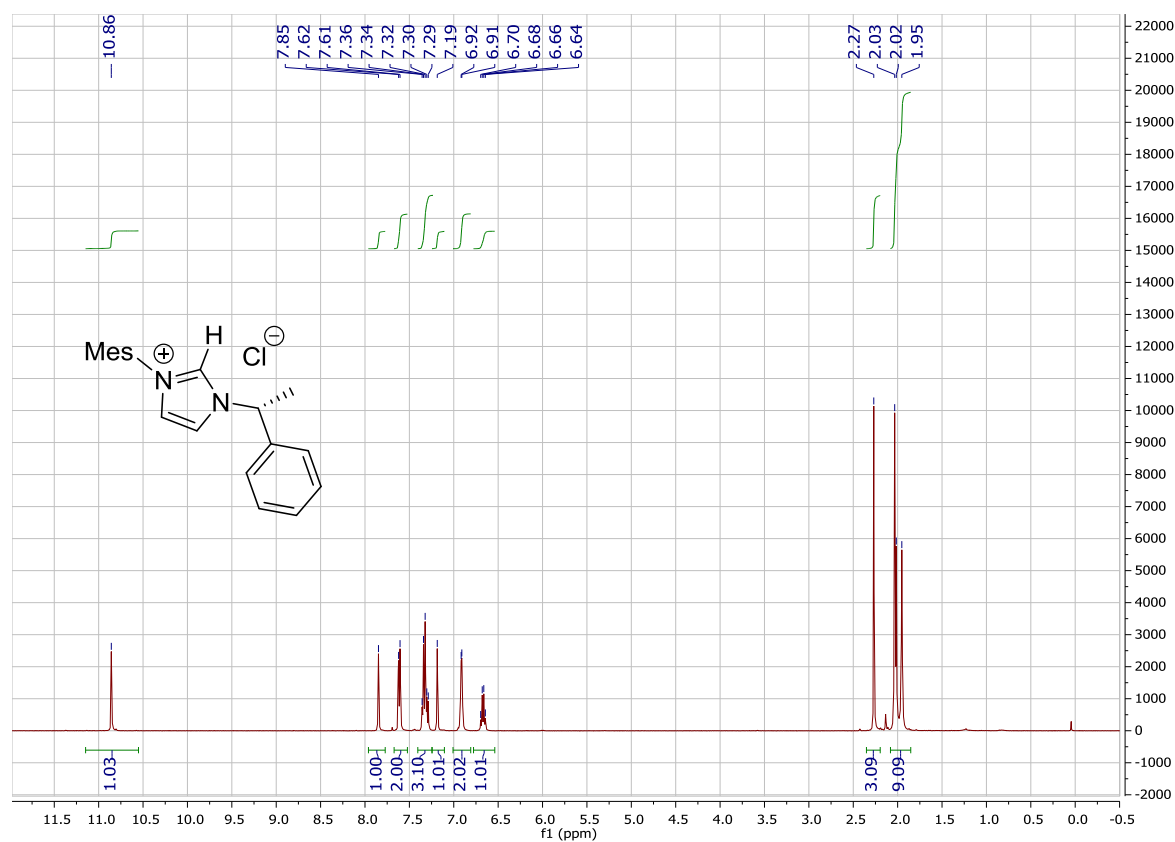

**Figure S2:**  $^1\text{H}$  NMR spectrum of 1-mesityl-3-((*R*)-1-phenylethyl)imidazolium chloride salt in  $\text{CDCl}_3$  recorded at 400 MHz.

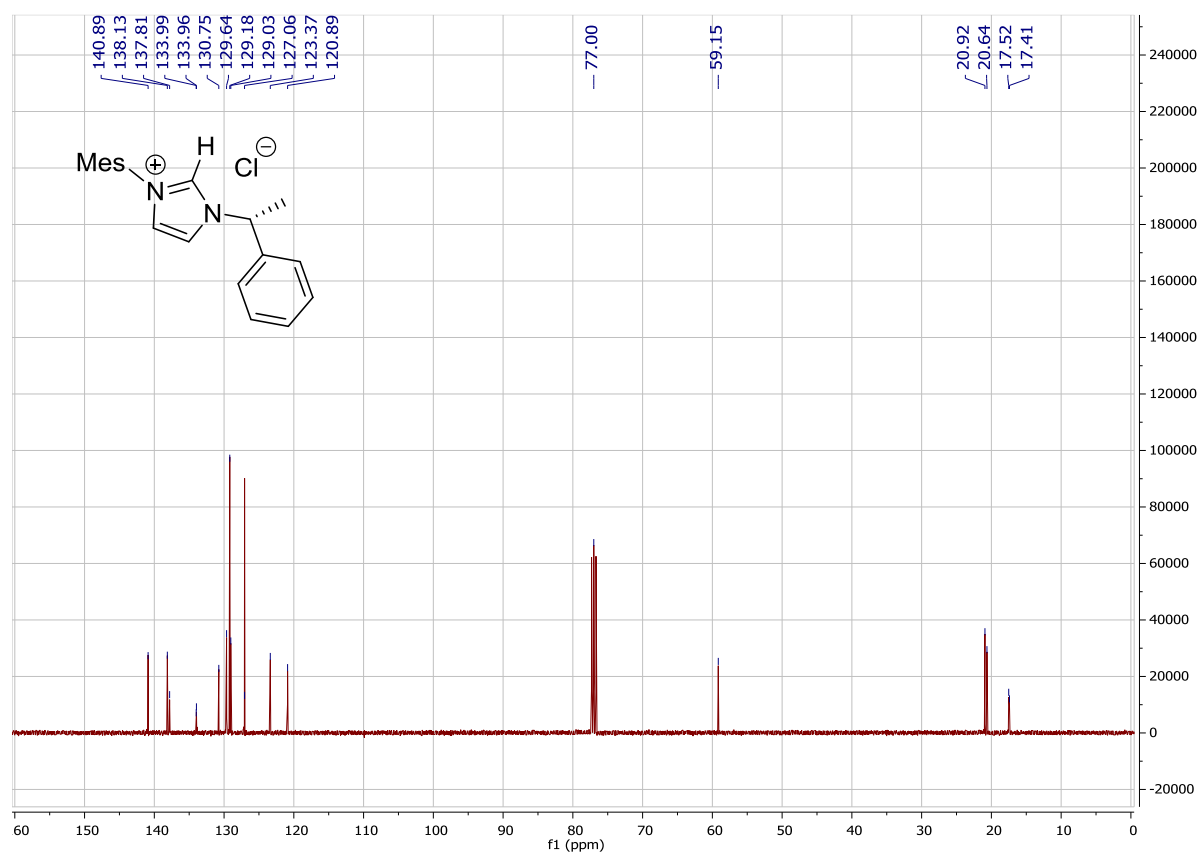

**Figure S3:**  $^{13}\text{C}\{^1\text{H}\}$  NMR spectrum of 1-mesityl-3-((*R*)-1-phenylethyl)imidazolium chloride salt in  $\text{CDCl}_3$  recorded at 101 MHz.

Chemical structure of compound **2** is shown above the spectrum. The structure is a complex organometallic compound featuring a central iron atom coordinated by a carbonyl group, a cyclopentadienylidene group, and a ferrocene-like moiety. The ferrocene-like moiety consists of two cyclopentadienyl rings sandwiching an iron atom, with a methyl group (Mes) attached to one of the rings. The cyclopentadienylidene group is also substituted with a methyl group (Mes) and a carbonyl group. The cyclopentadienylidene group is further substituted with a carbonyl group and a ferrocene-like moiety. The ferrocene-like moiety consists of two cyclopentadienyl rings sandwiching an iron atom, with a methyl group (Mes) attached to one of the rings. The cyclopentadienylidene group is also substituted with a methyl group (Mes) and a carbonyl group. The cyclopentadienylidene group is further substituted with a carbonyl group and a ferrocene-like moiety.

**1H NMR spectrum (CDCl<sub>3</sub>) data:**

| Chemical Shift (ppm) | Integration |
|----------------------|-------------|
| 7.26                 | 4.02        |
| 6.99                 | 1.97        |
| 6.86                 | 1.97        |
| 2.35                 | 6.00        |
| 2.21                 | 16.68       |
| 2.20                 | 16.68       |
| 2.19                 | 16.68       |
| 2.15                 | 16.68       |
| 1.33                 | 2.22        |
| 1.30                 | 2.22        |
| 0.99                 | 2.17        |
| 0.96                 | 2.17        |
| 0.94                 | 2.17        |
| 0.05                 | 18.07       |

Chemical structure of compound **2** is shown as an inset. The structure is a complex organometallic compound featuring a ferrocene core. The ferrocene core consists of two cyclopentadienyl rings sandwiching an iron (Fe) atom. The top ring is substituted with a TMS group, a carbonyl (C=O) group, and a TMS group. The bottom ring is substituted with a TMS group, a carbonyl (C=O) group, and a TMS group. The ferrocene core is further substituted with a Mes group and a CO group. The chemical structure is labeled **2**.

The  $^1\text{H}$  NMR spectrum (CDCl<sub>3</sub>) shows the following peaks (ppm):

- 217.41
- 187.80
- 179.52
- 139.61
- 138.23
- 136.43
- 129.47
- 126.22
- 104.86
- 77.00
- 67.55
- 24.66
- 21.88
- 21.05
- 19.11
- 0.49

S11

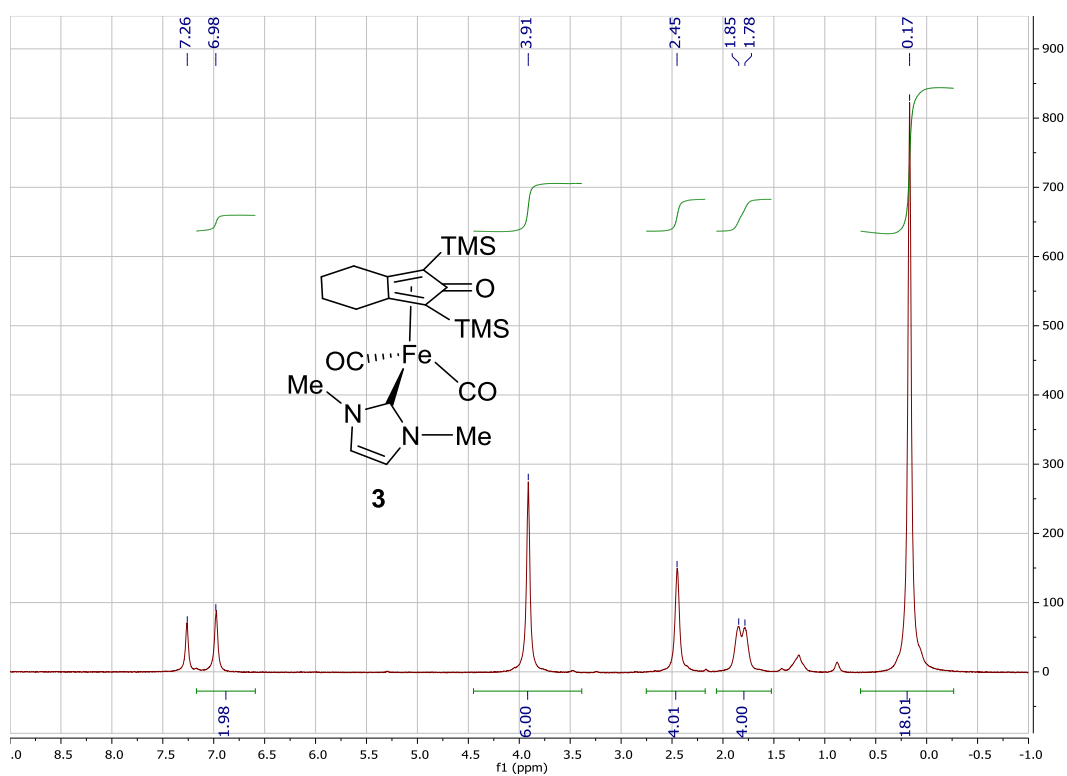

**Figure S6:**  $^1\text{H}$  NMR spectrum of the complex **3** in  $\text{CDCl}_3$  recorded at 500MHz.

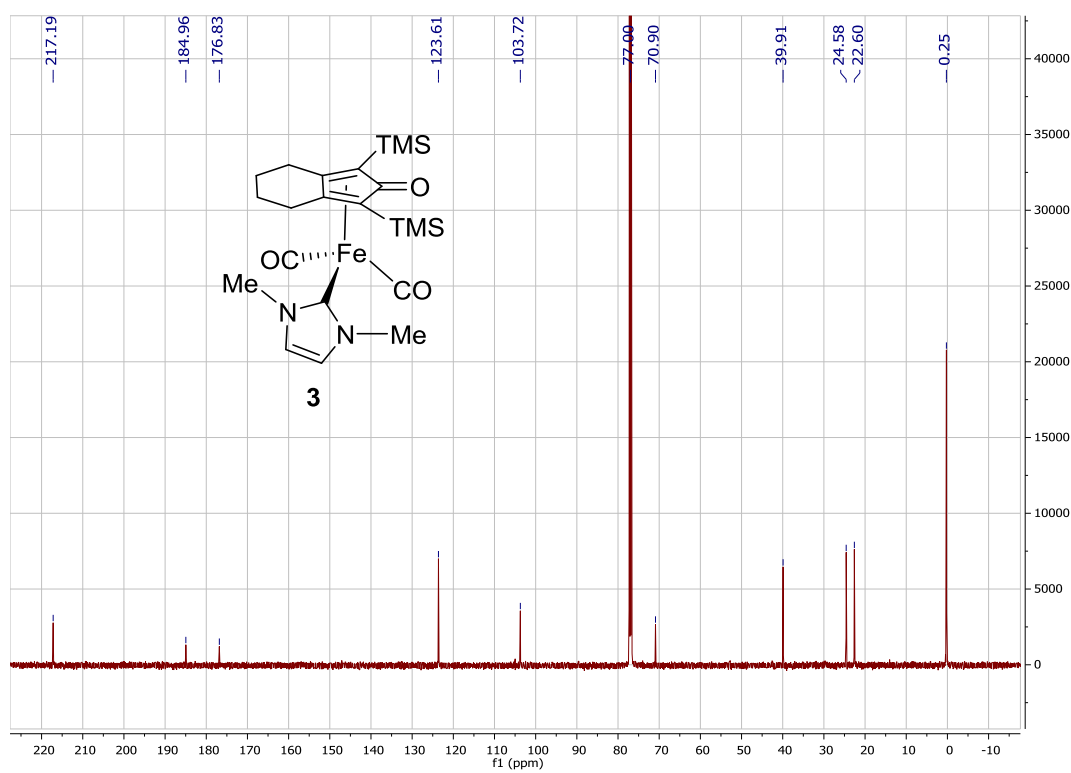

**Figure S7:**  $^{13}\text{C}\{^1\text{H}\}$  NMR spectrum of the complex **3** in  $\text{CDCl}_3$  recorded at 125 MHz.

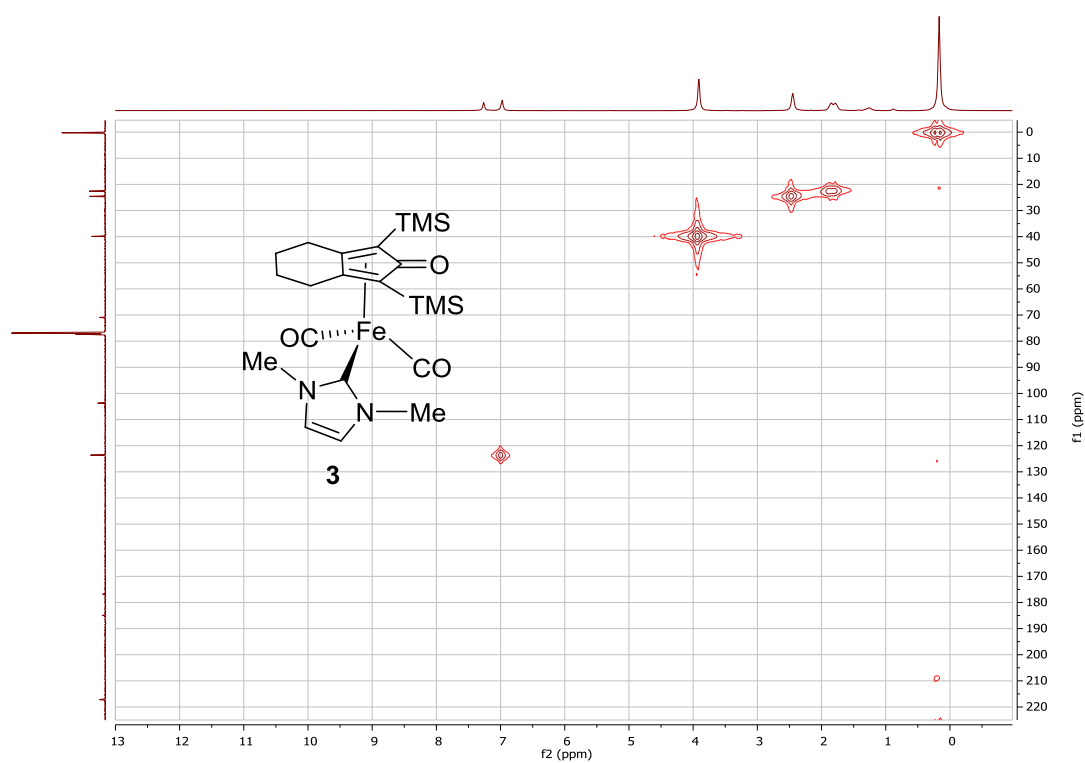

**Figure S8:**  $^1\text{H}$   $^{13}\text{C}$  HSQC NMR spectrum of the complex **3** in  $\text{CDCl}_3$  recorded at 500 MHz,  $^{13}\text{C}\{^1\text{H}\}$  125 MHz.

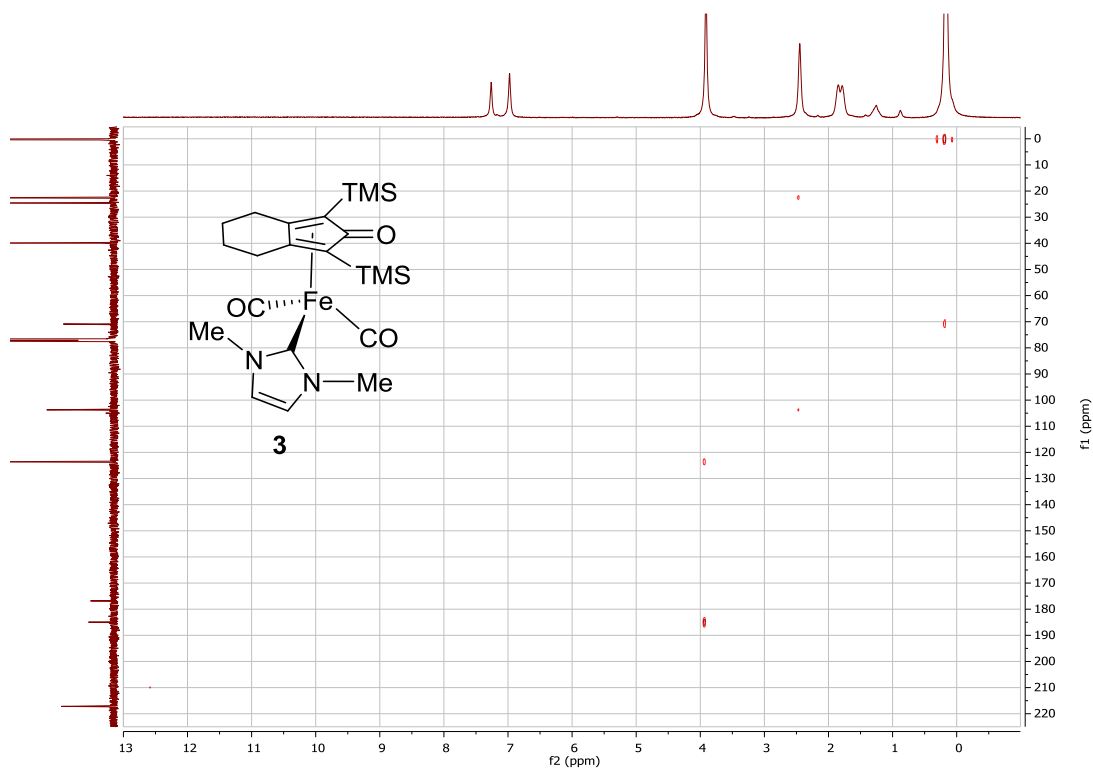

**Figure S9:**  $^1\text{H}$   $^{13}\text{C}$  HMBC NMR spectrum of the complex **3** in  $\text{CDCl}_3$  recorded at 500 MHz,  $^{13}\text{C}\{^1\text{H}\}$  125 MHz.

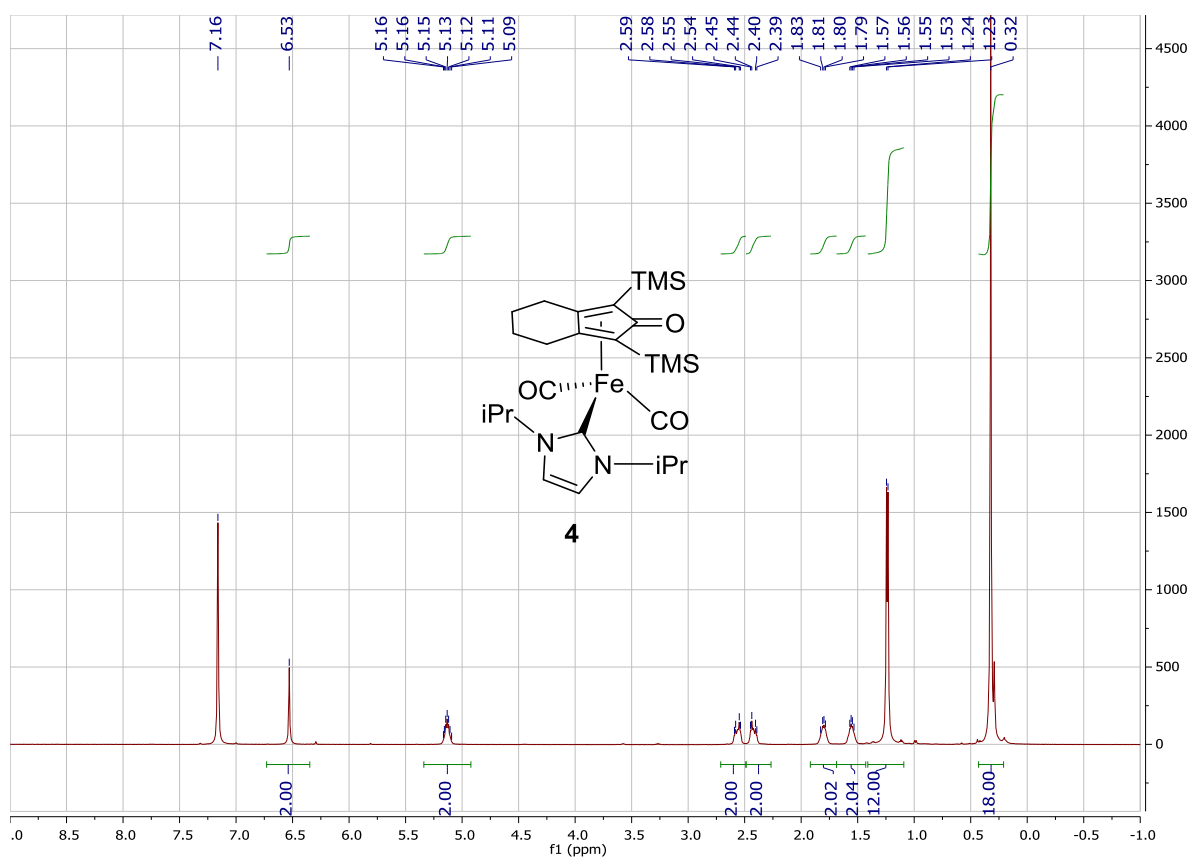

**Figure S10:** <sup>1</sup>H NMR spectrum of the complex **4** in C<sub>6</sub>D<sub>6</sub> recorded at 500MHz.

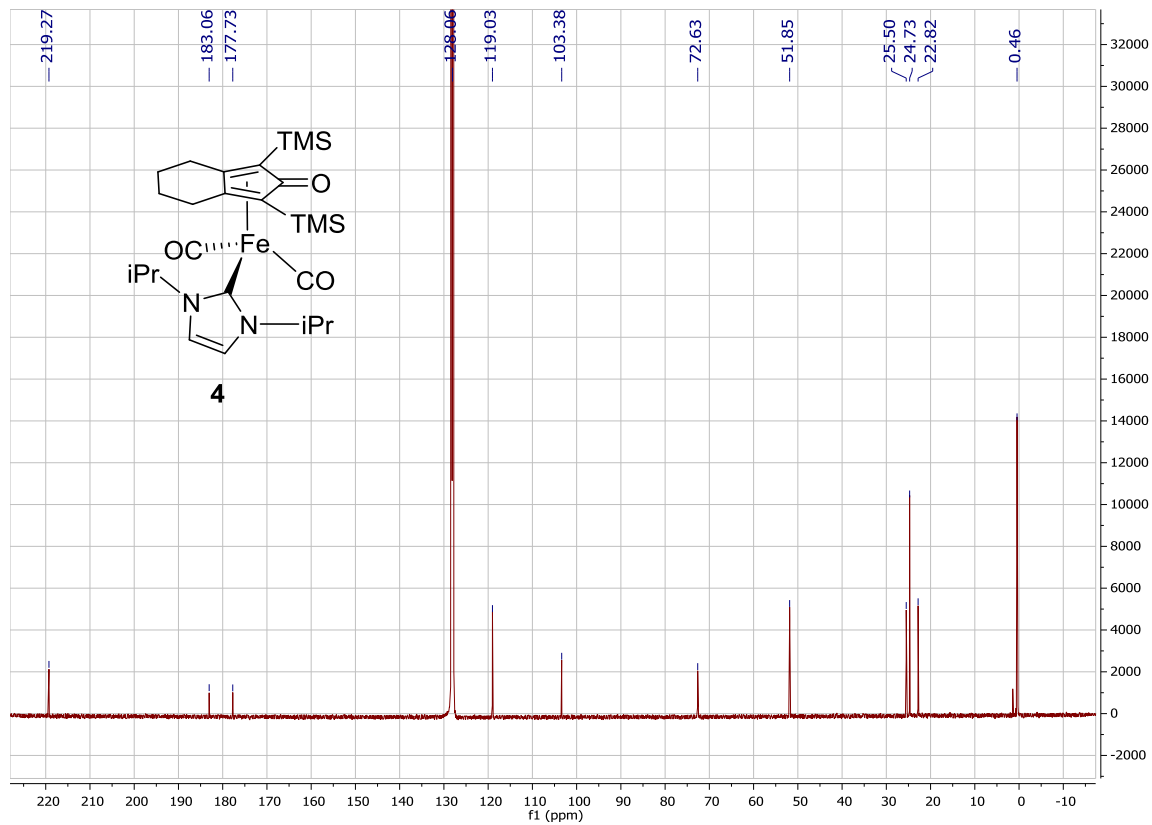

**Figure S11:** <sup>13</sup>C{<sup>1</sup>H} NMR spectrum of the complex **4** in C<sub>6</sub>D<sub>6</sub> recorded at 125 MHz.

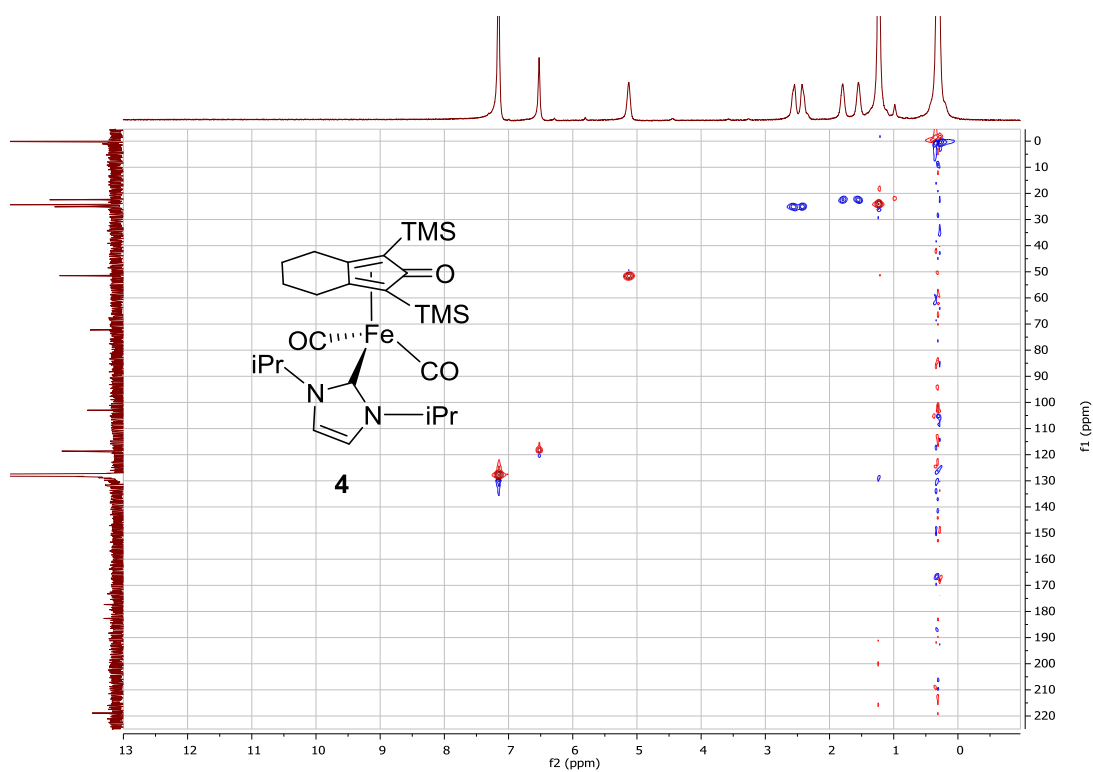

**Figure S12:**  $^1\text{H}$   $^{13}\text{C}$  HSQC NMR spectrum of the complex **4** in  $\text{C}_6\text{D}_6$  recorded at 500 MHz,  $^{13}\text{C}\{^1\text{H}\}$  125 MHz.

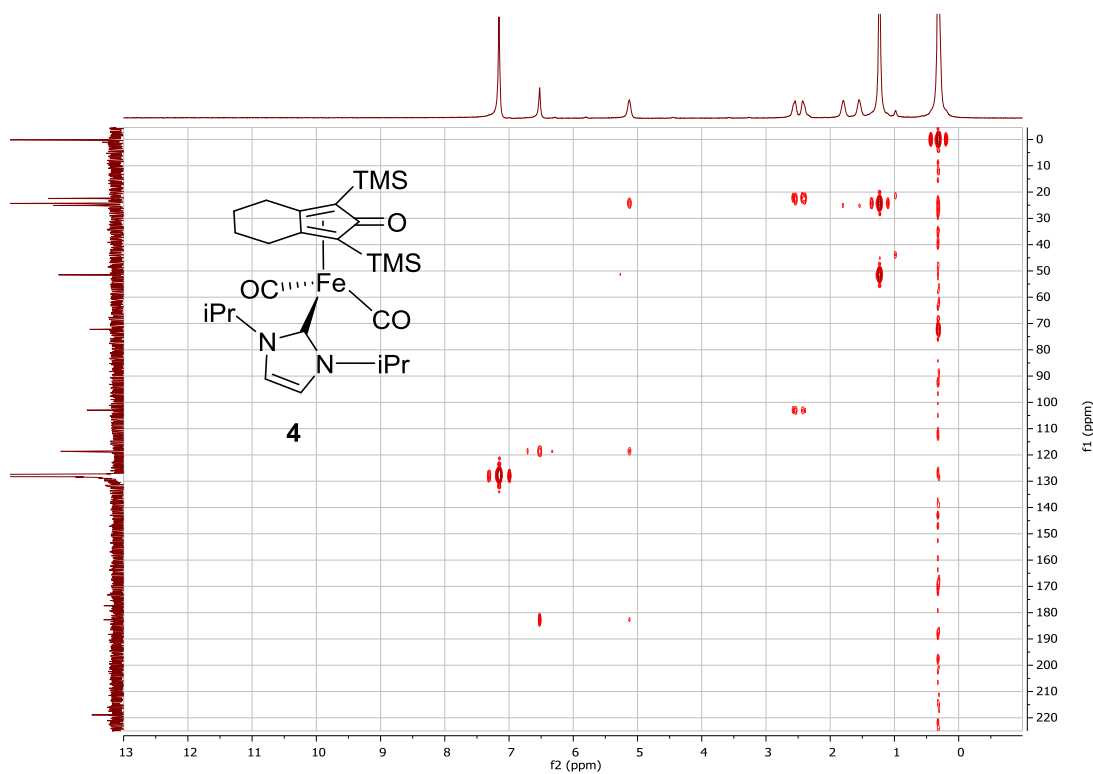

**Figure S13:**  $^1\text{H}$   $^{13}\text{C}$  HMBC NMR spectrum of the complex **4** in  $\text{C}_6\text{D}_6$  recorded at 500 MHz,  $^{13}\text{C}\{^1\text{H}\}$  125 MHz.

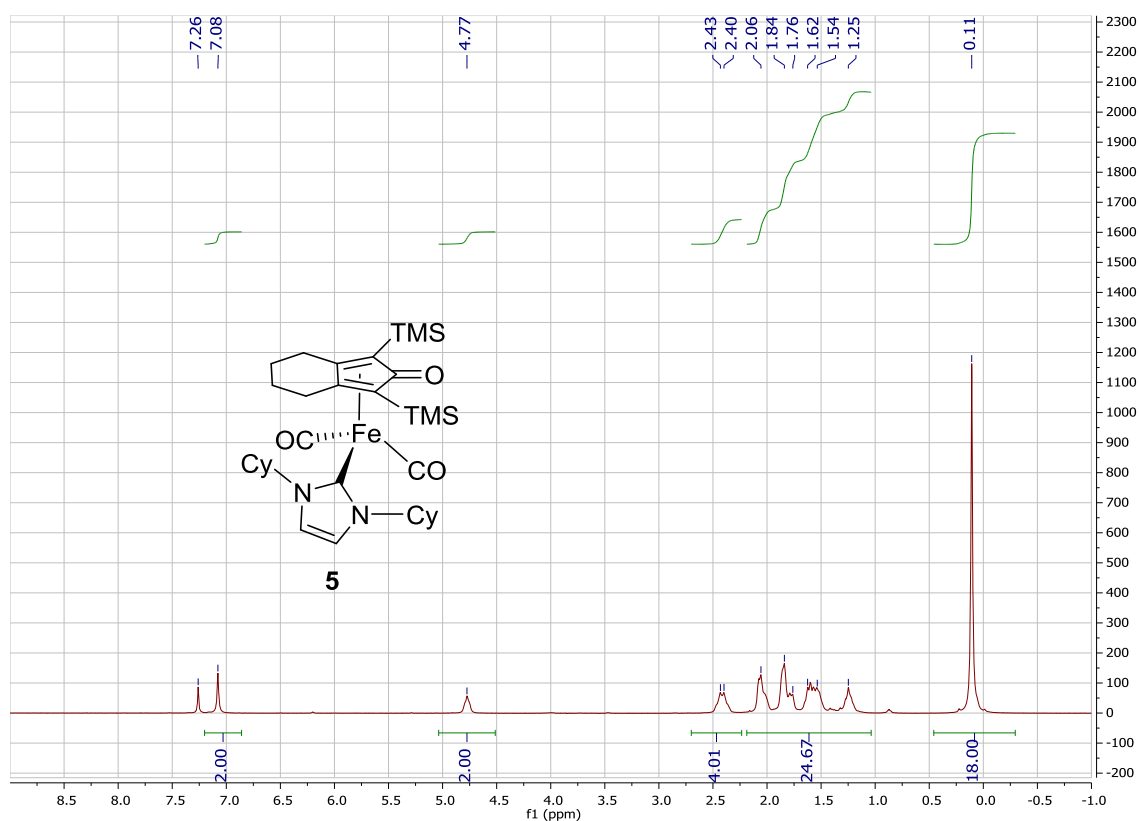

**Figure S14:** <sup>1</sup>H NMR spectrum of the complex **5** in CDCl<sub>3</sub> recorded at 500MHz.

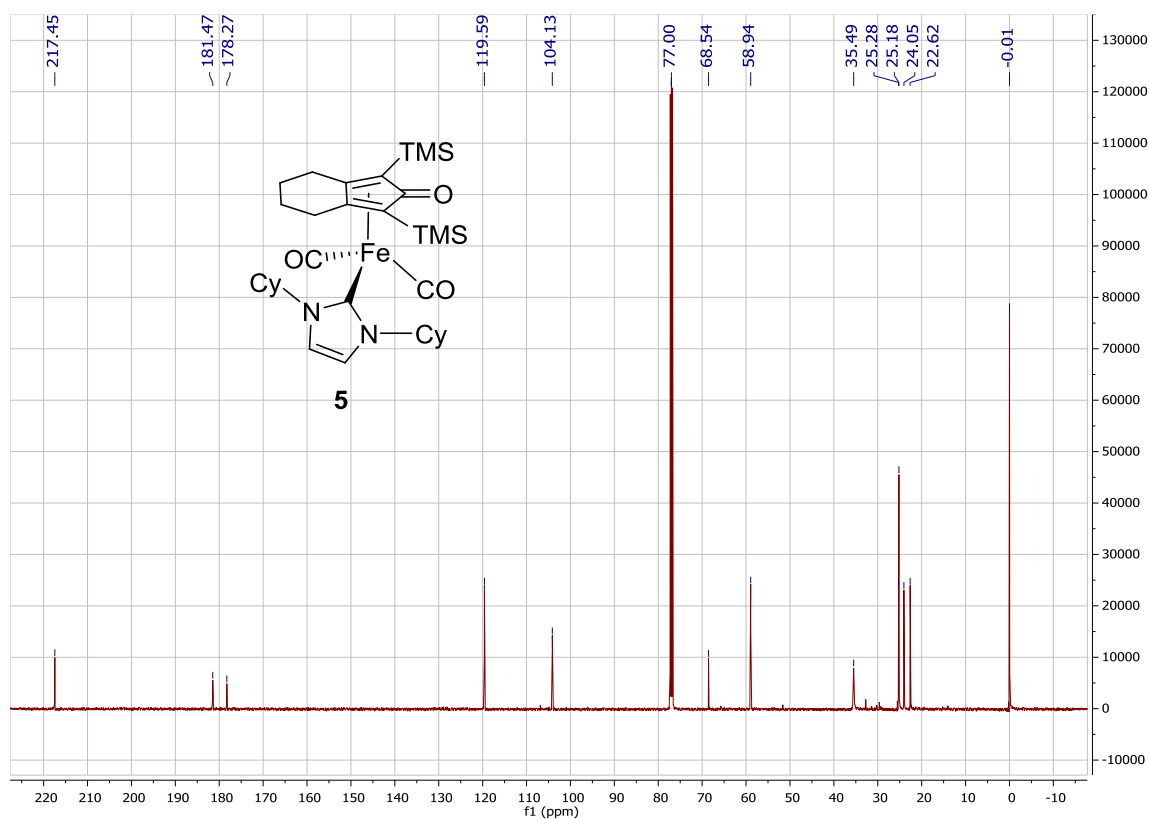

**Figure S15:** <sup>13</sup>C{<sup>1</sup>H} NMR spectrum of the complex **5** in CDCl<sub>3</sub> recorded at 125 MHz.



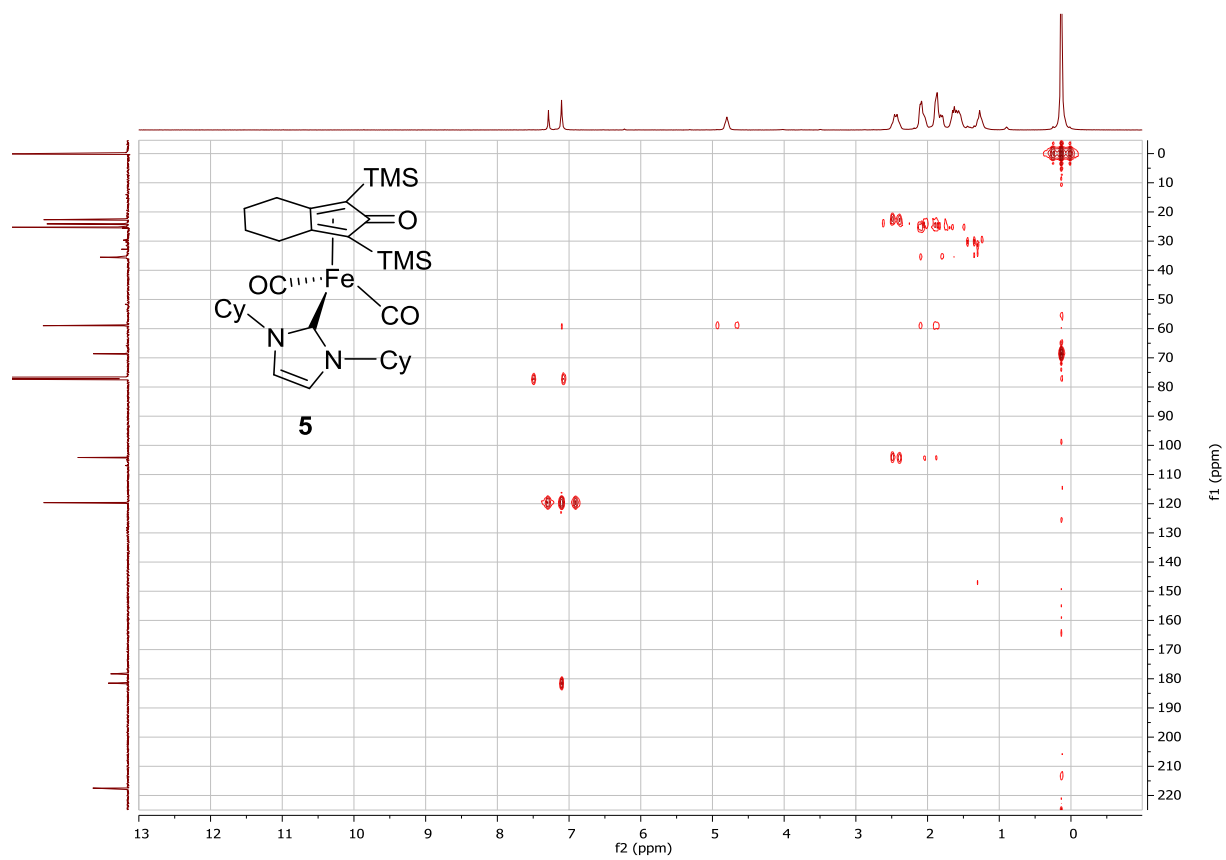

**Figure S16:**  $^1\text{H}$   $^{13}\text{C}$  HMBC NMR spectrum of the complex **5** in  $\text{CDCl}_3$  recorded at 500 MHz,  $^{13}\text{C}\{^1\text{H}\}$  125 MHz.

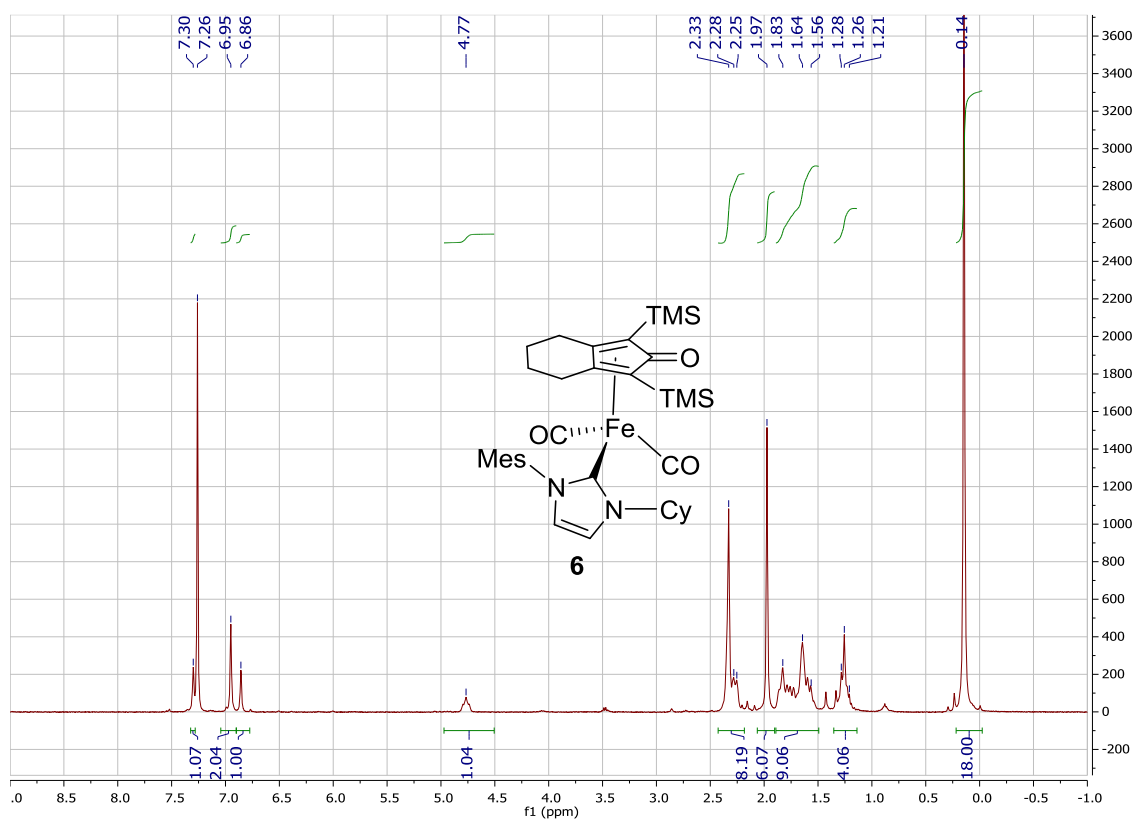

**Figure S17:** <sup>1</sup>H NMR spectrum of the complex **6** in CDCl<sub>3</sub> recorded at 400MHz.

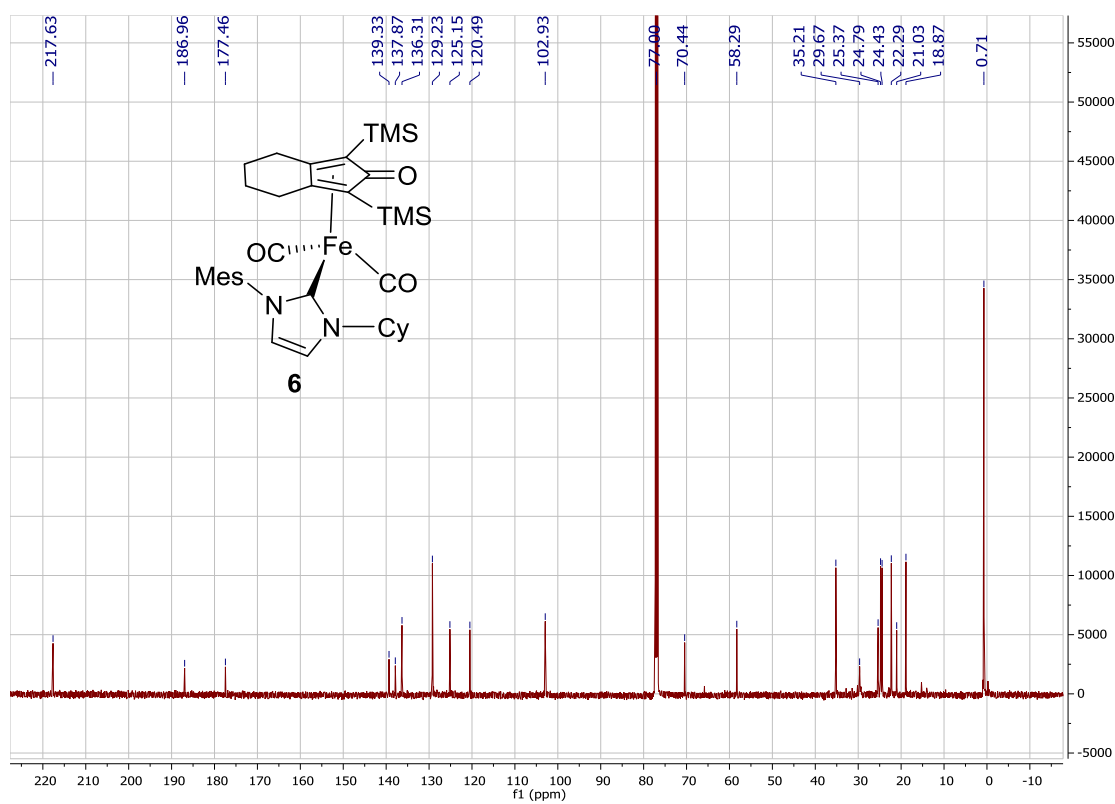

**Figure S18:** <sup>13</sup>C{<sup>1</sup>H} NMR spectrum of the complex **6** in CDCl<sub>3</sub> recorded at 125 MHz.

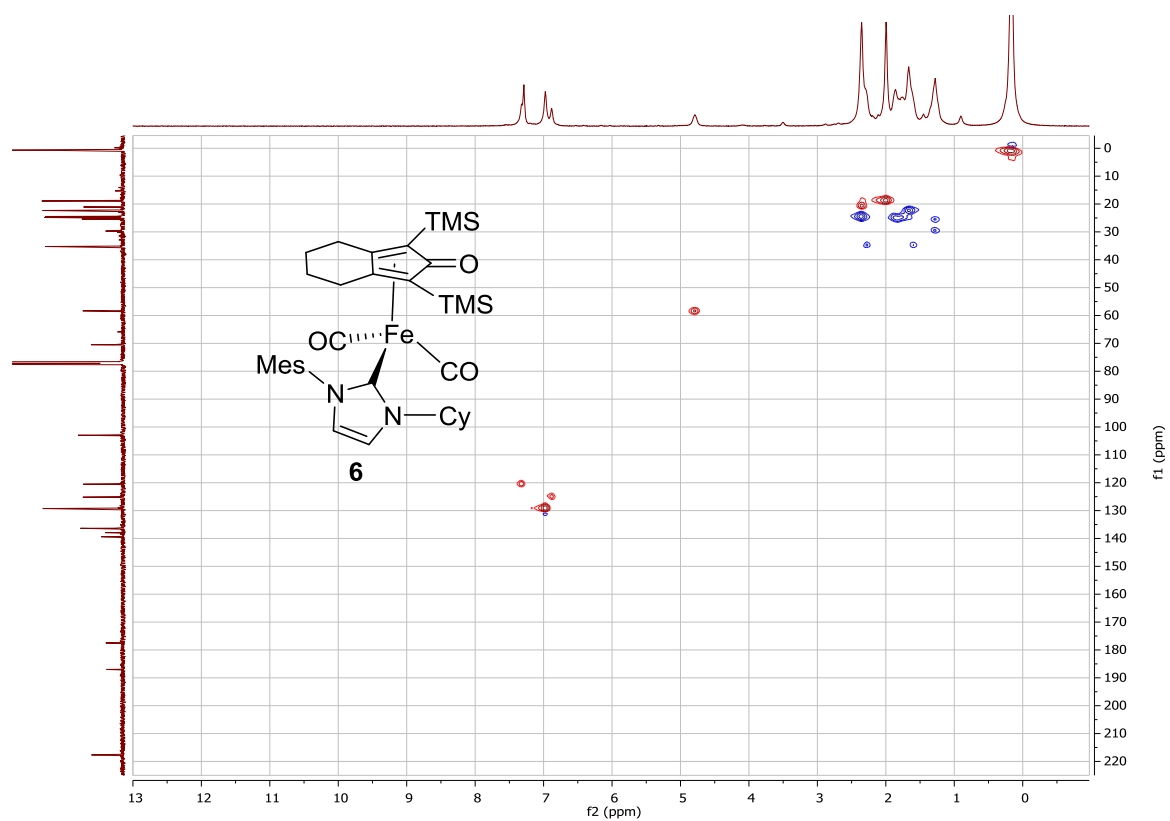

**Figure S19:**  $^1\text{H}$   $^{13}\text{C}$  HSQC NMR spectrum of the complex **6** in  $\text{CDCl}_3$  recorded at 500 MHz,  $^{13}\text{C}\{^1\text{H}\}$  125 MHz.

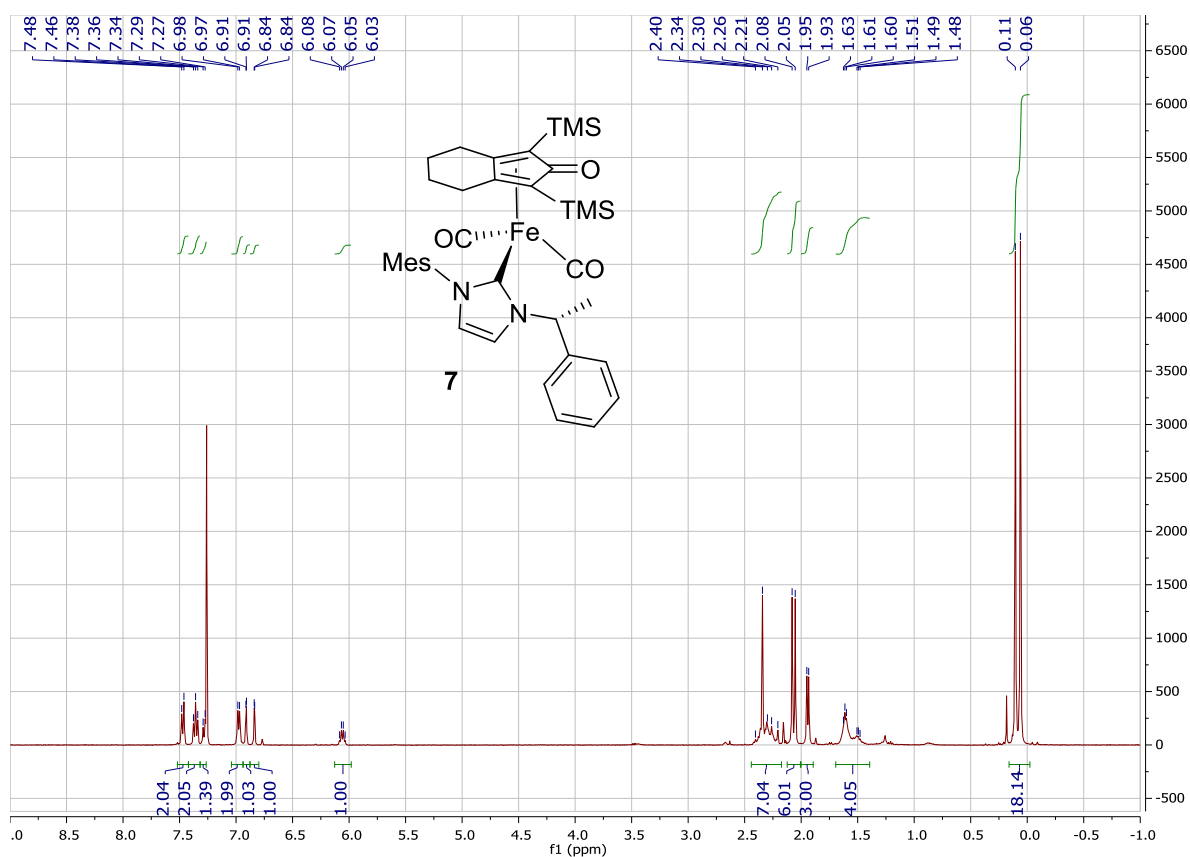

**Figure S20:** <sup>1</sup>H NMR spectrum of the complex **7** in CDCl<sub>3</sub> recorded at 400MHz.

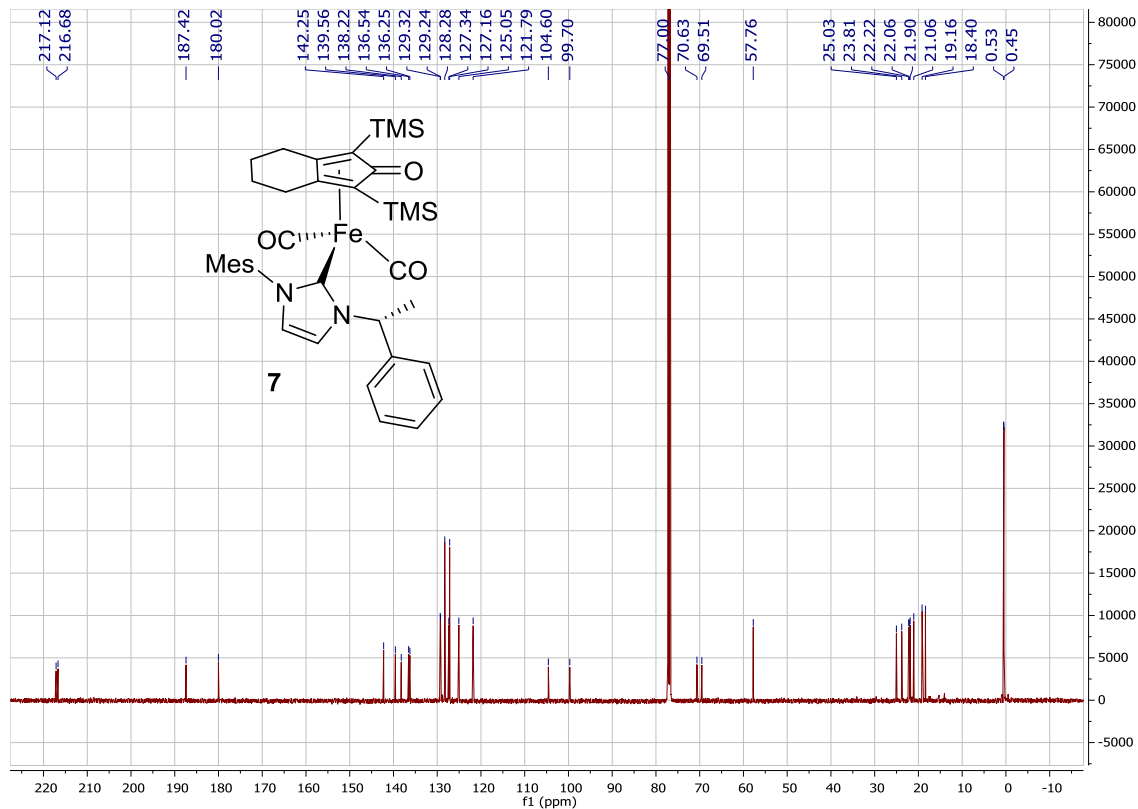

**Figure S21:** <sup>13</sup>C{<sup>1</sup>H} NMR spectrum of the complex **7** in CDCl<sub>3</sub> recorded at 125 MHz.

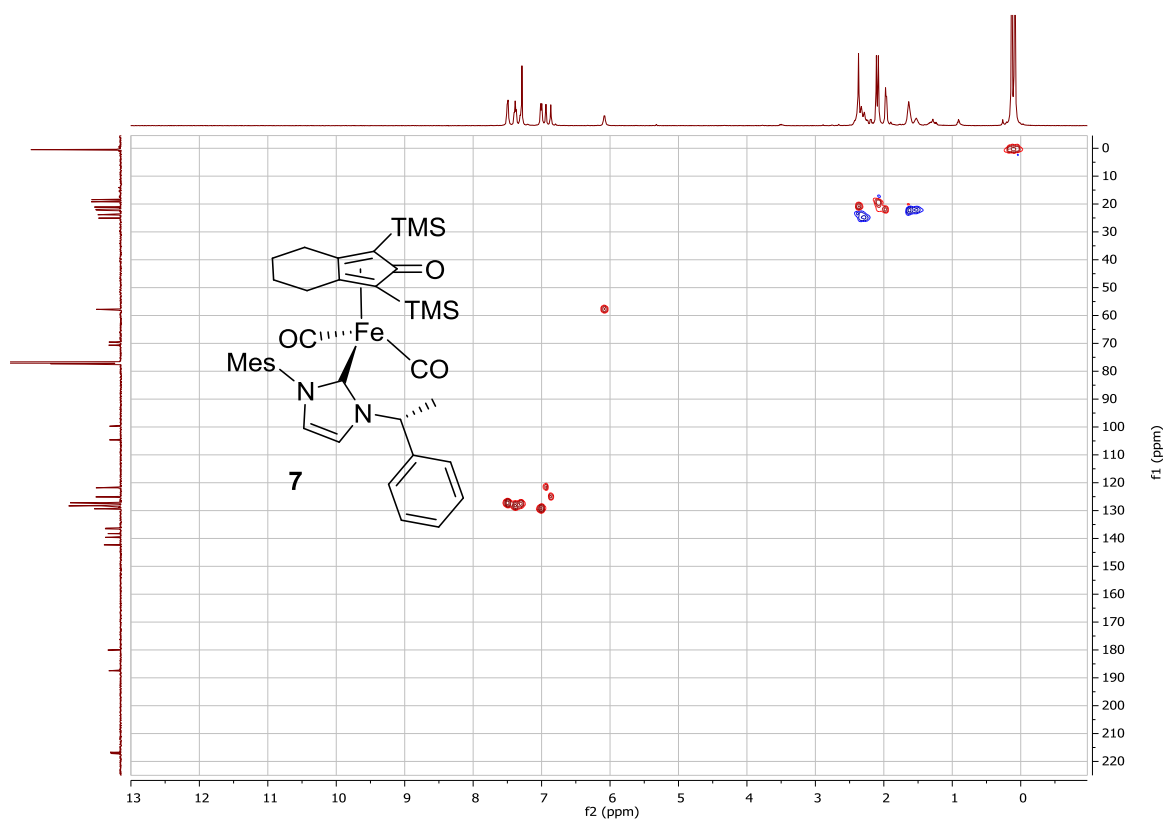

**Figure S22:**  $^1\text{H}$   $^{13}\text{C}$  HSQC NMR spectrum of the complex **7** in  $\text{CDCl}_3$  recorded at 500 MHz,  $^{13}\text{C}\{^1\text{H}\}$  125 MHz.

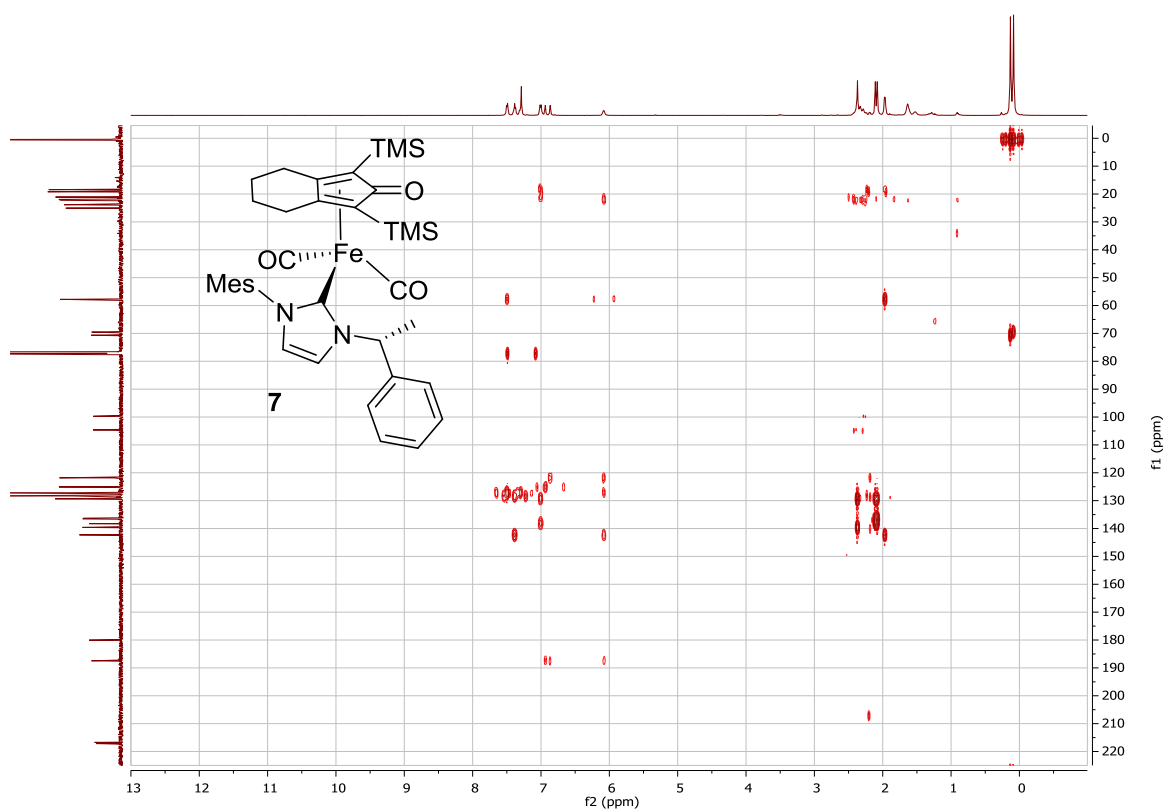

**Figure S23:**  $^1\text{H}$   $^{13}\text{C}$  HMBC NMR spectrum of the complex **7** in  $\text{CDCl}_3$  recorded at 500 MHz,  $^{13}\text{C}\{^1\text{H}\}$  125 MHz.

## $^1\text{H}$ and $^{13}\text{C}\{^1\text{H}\}$ Spectra of the benzonitrile derivatives

### Benzonitrile

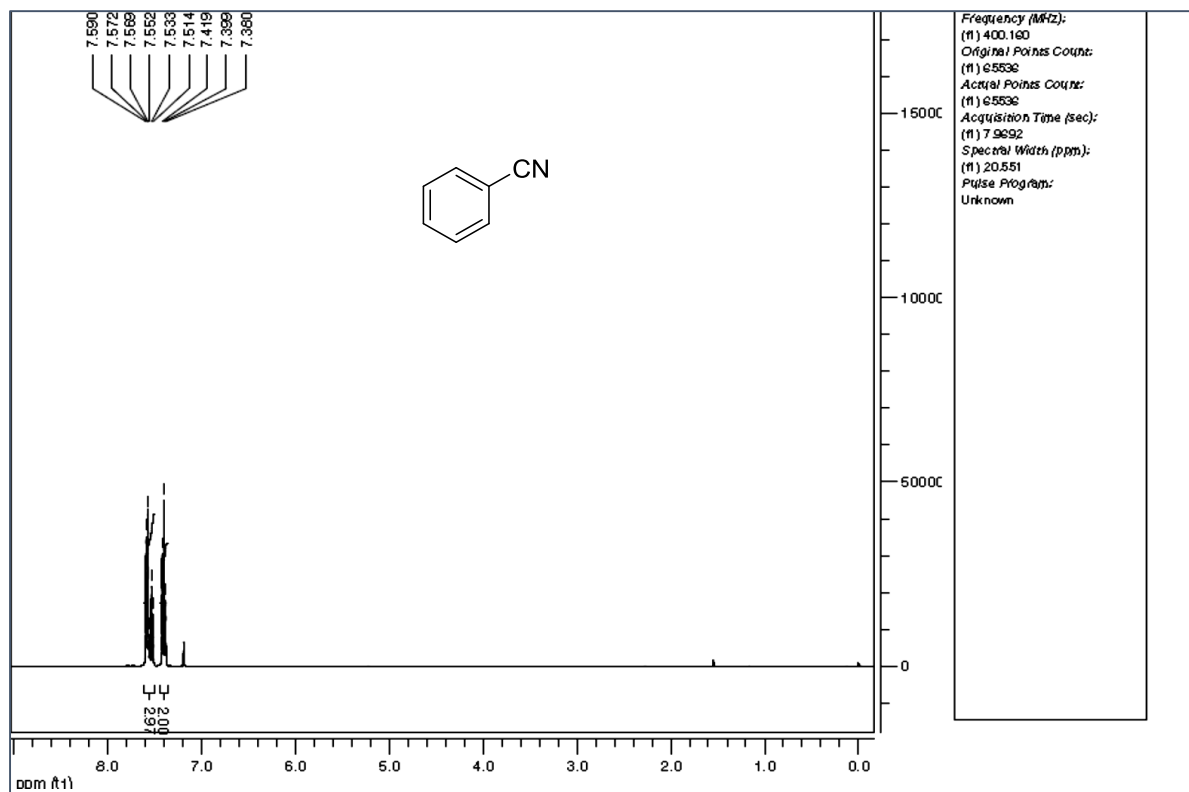

Figure S24:  $^1\text{H}$  NMR spectrum of benzonitrile in  $\text{CDCl}_3$  recorded at 400 MHz.

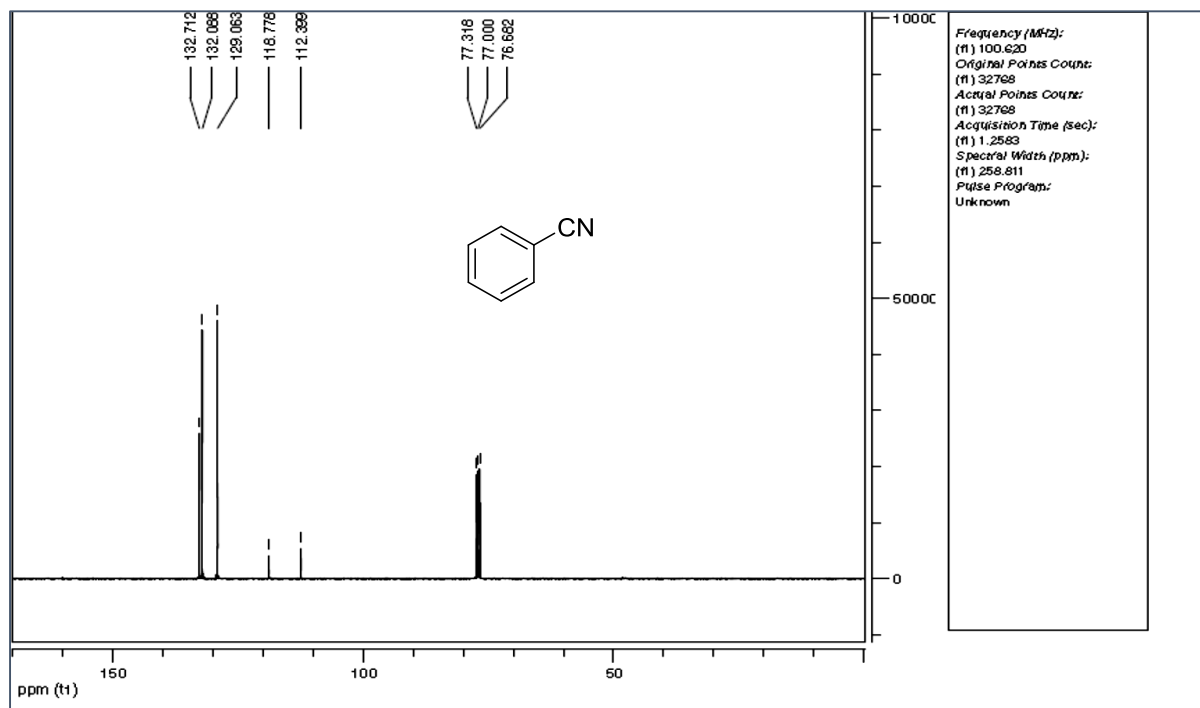

Figure S25:  $^{13}\text{C}\{^1\text{H}\}$  NMR spectrum of benzonitrile in  $\text{CDCl}_3$  recorded at 100 MHz.

## 4-Methylbenzonitrile

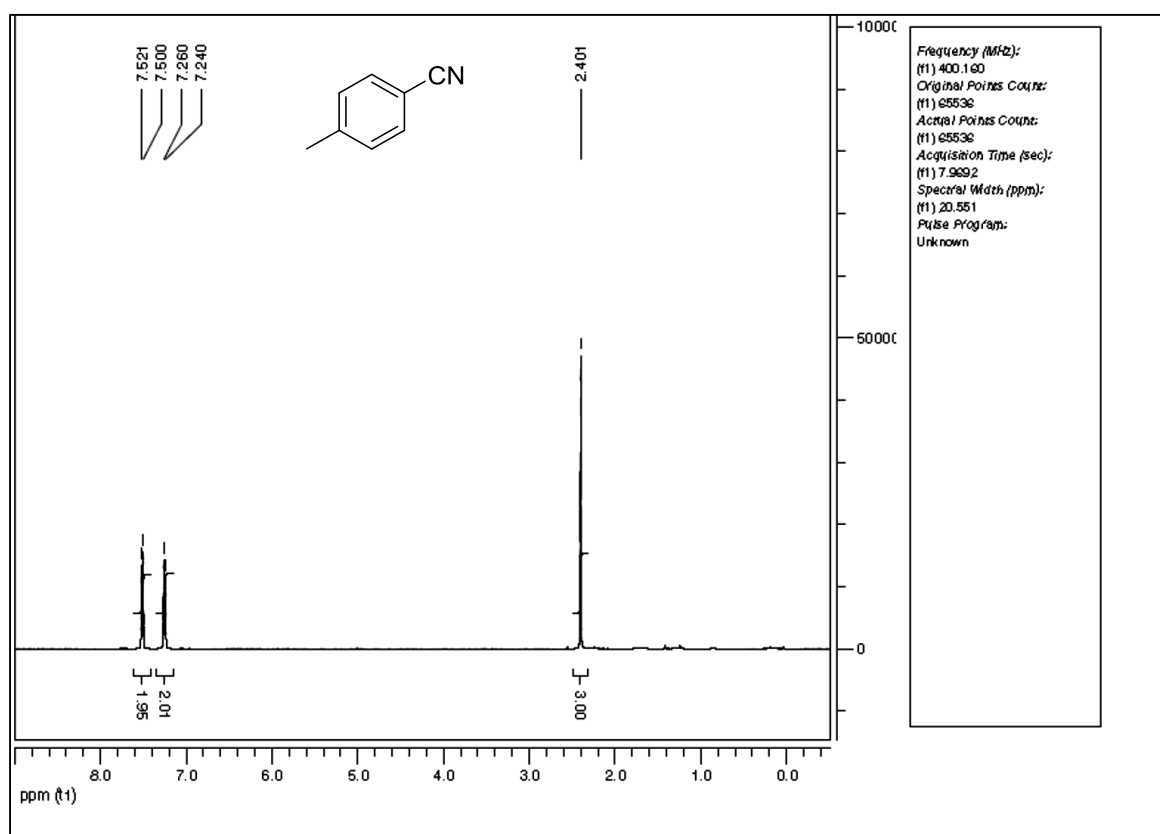

**Figure S26:**  $^1\text{H}$  NMR spectrum of 4-methylbenzonitrile in  $\text{CDCl}_3$  recorded at 400 MHz.

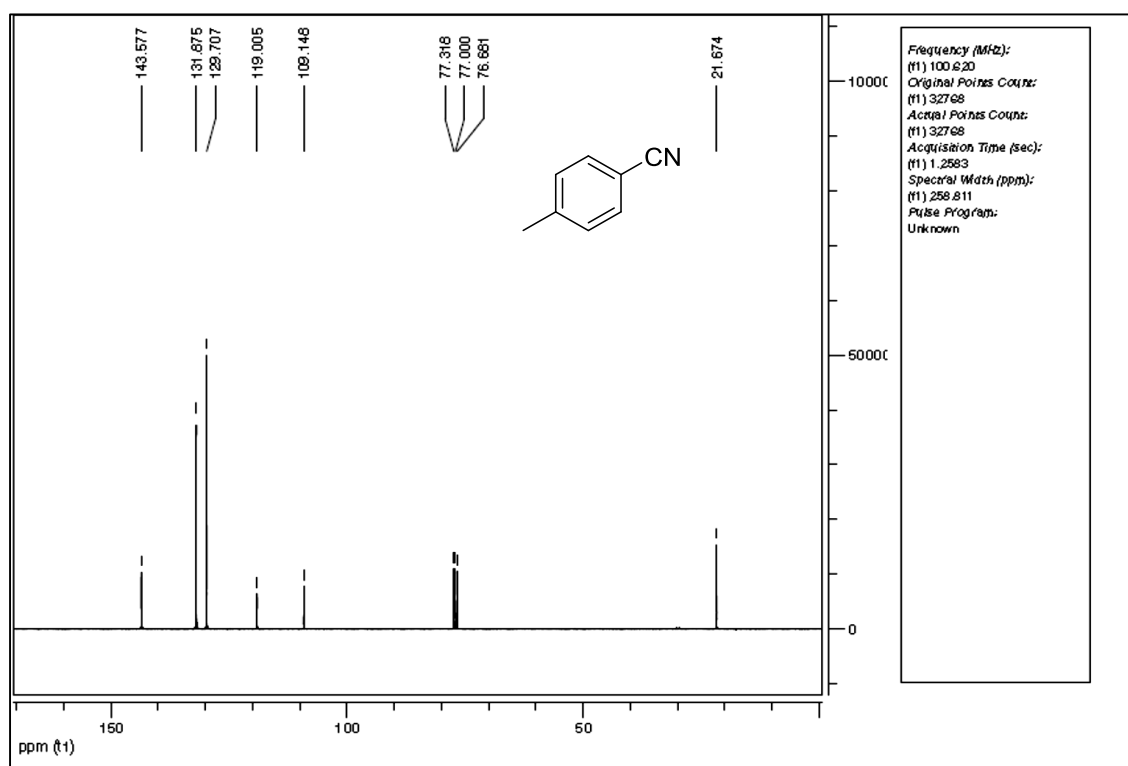

**Figure S27:**  $^{13}\text{C}\{^1\text{H}\}$  NMR spectrum of 4-methylbenzonitrile in  $\text{CDCl}_3$  recorded at 100 MHz.

### 3-Methylbenzonitrile

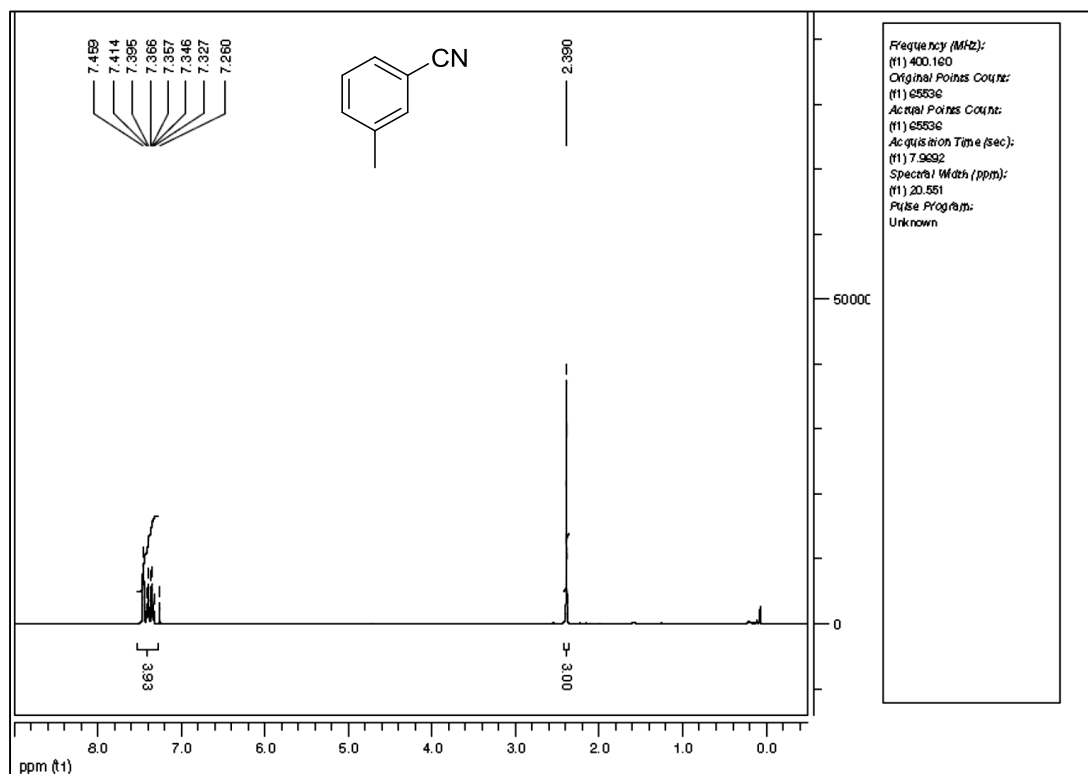

**Figure S28:**  $^1\text{H}$  NMR spectrum of 3-methylbenzonitrile in  $\text{CDCl}_3$  recorded at 400MHz.

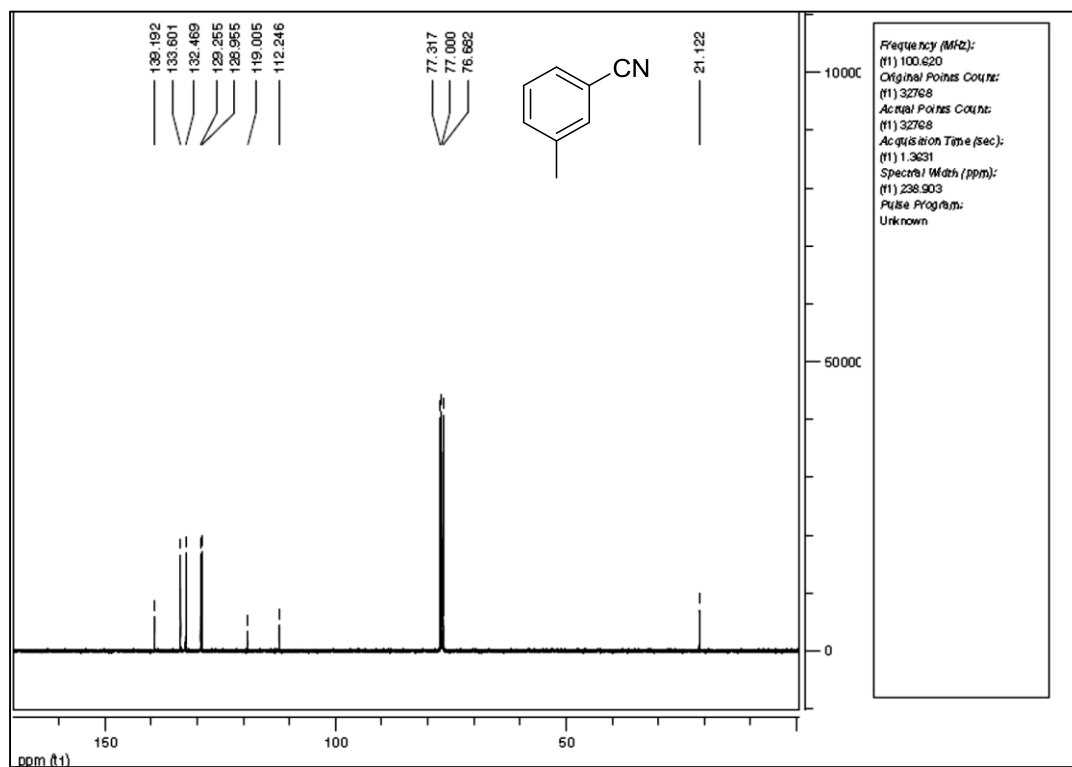

**Figure S29:**  $^{13}\text{C}\{^1\text{H}\}$  NMR spectrum of 3-methylbenzonitrile in  $\text{CDCl}_3$  recorded at 100 MHz.



## 2-Methylbenzonitrile

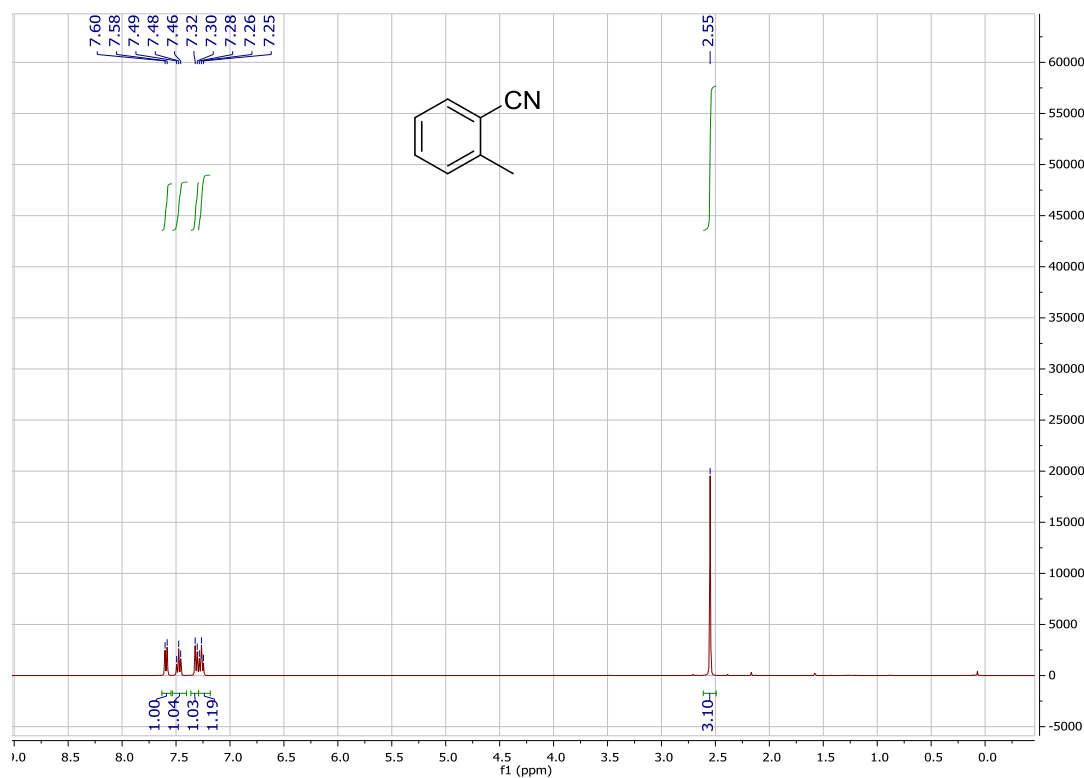

**Figure S30:** <sup>1</sup>H NMR spectrum of 2-methylbenzonitrile in CDCl<sub>3</sub> recorded at 400 MHz.

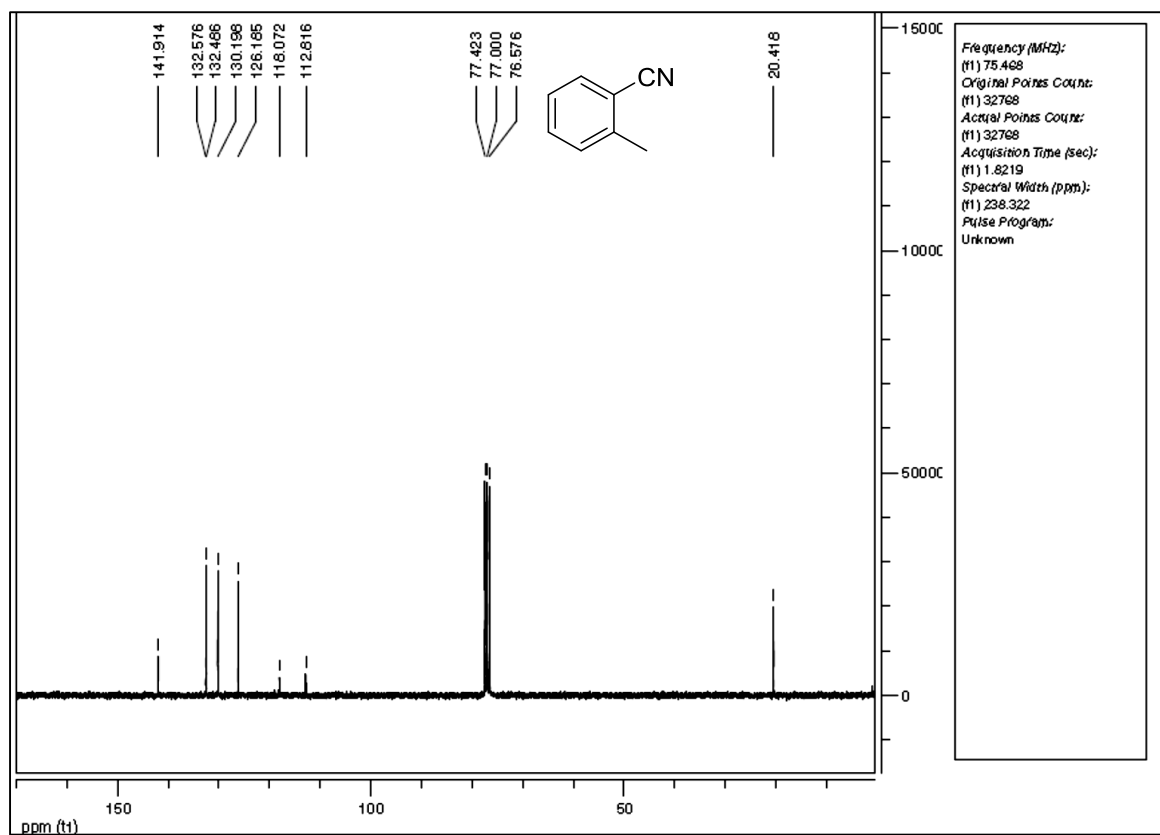

**Figure S31:** <sup>13</sup>C{<sup>1</sup>H} NMR spectrum of 2-methylbenzonitrile in CDCl<sub>3</sub> recorded at 75 MHz.

## 4-Bromobenzonitrile

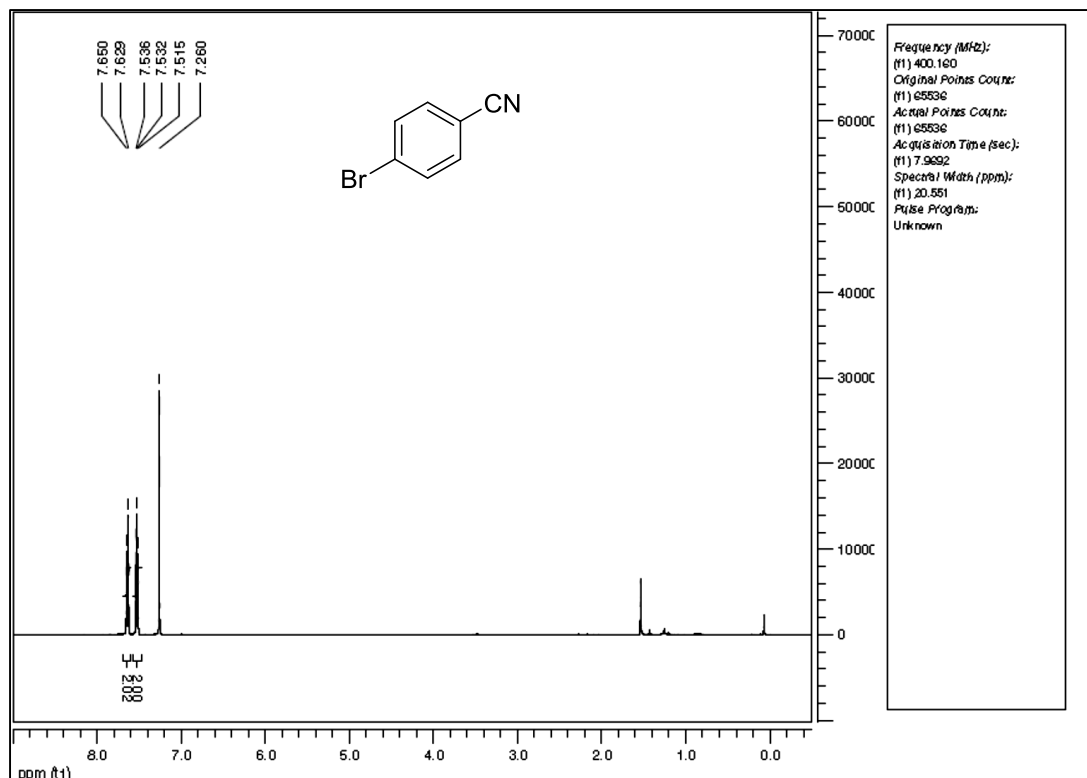

**Figure S32:** <sup>1</sup>H NMR spectrum of 4-bromobenzonitrile in CDCl<sub>3</sub> recorded at 400 MHz.

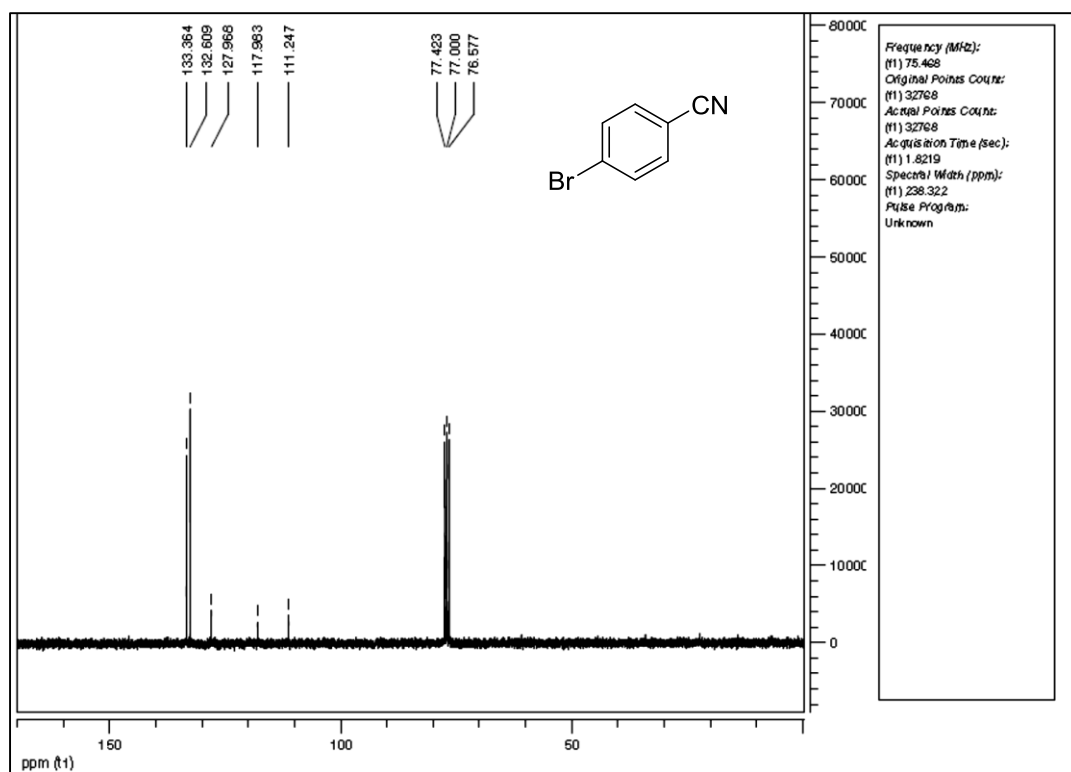

**Figure S33:** <sup>13</sup>C{<sup>1</sup>H} NMR spectrum of 4-bromobenzonitrile in CDCl<sub>3</sub> recorded at 75 MHz.

***p*-Chlorobenzonitrile**

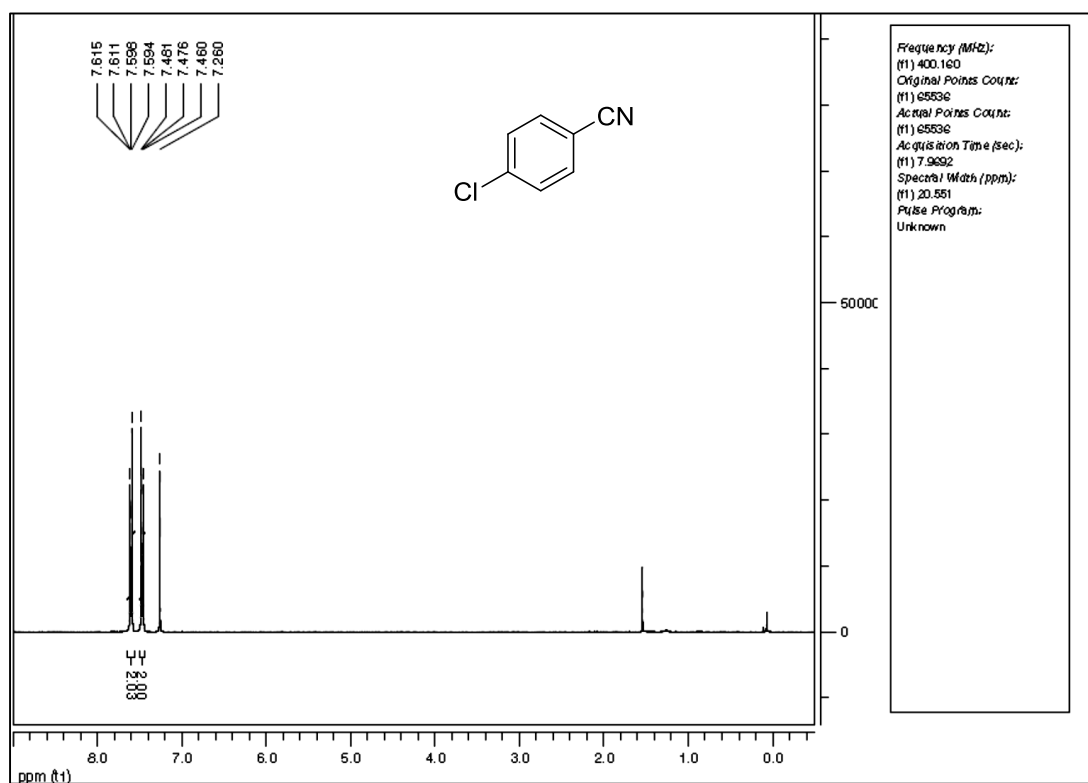

**Figure S34:**  $^1\text{H}$  NMR spectrum of 4-chlorobenzonitrile in  $\text{CDCl}_3$  recorded at 400MHz.

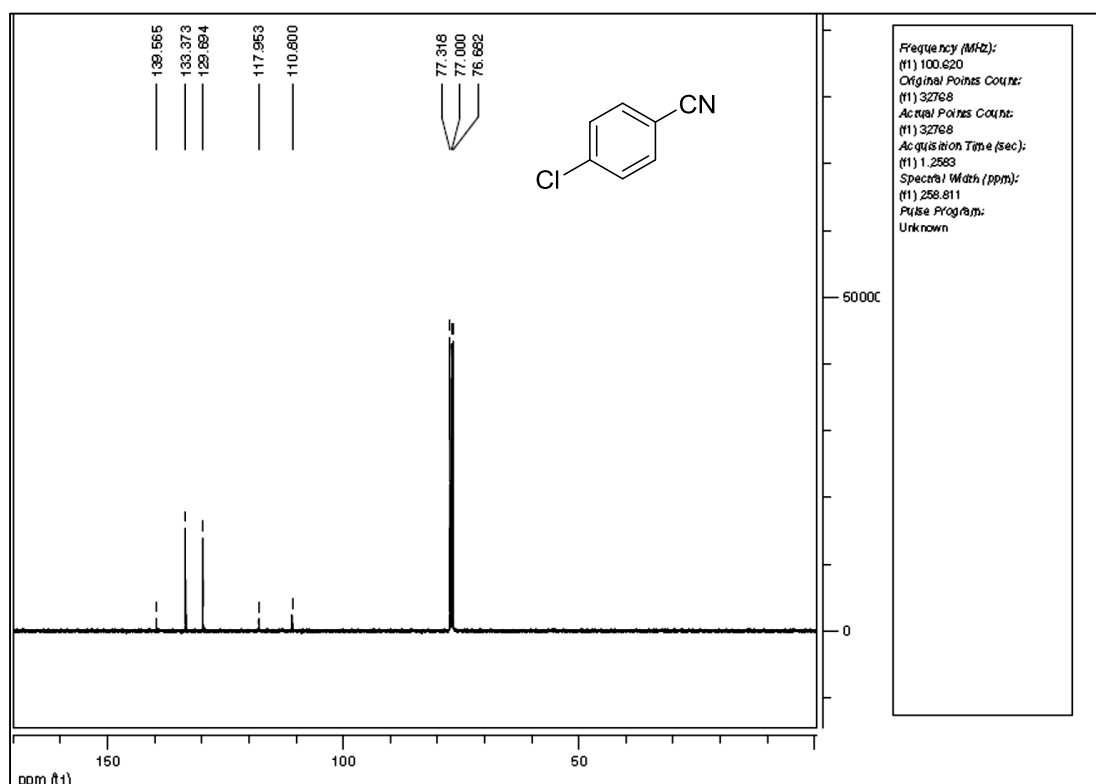

**Figure S35:**  $^{13}\text{C}\{^1\text{H}\}$  NMR spectrum of 4-chlorobenzonitrile in  $\text{CDCl}_3$  recorded at 100 MHz.

## Cinnamotrile

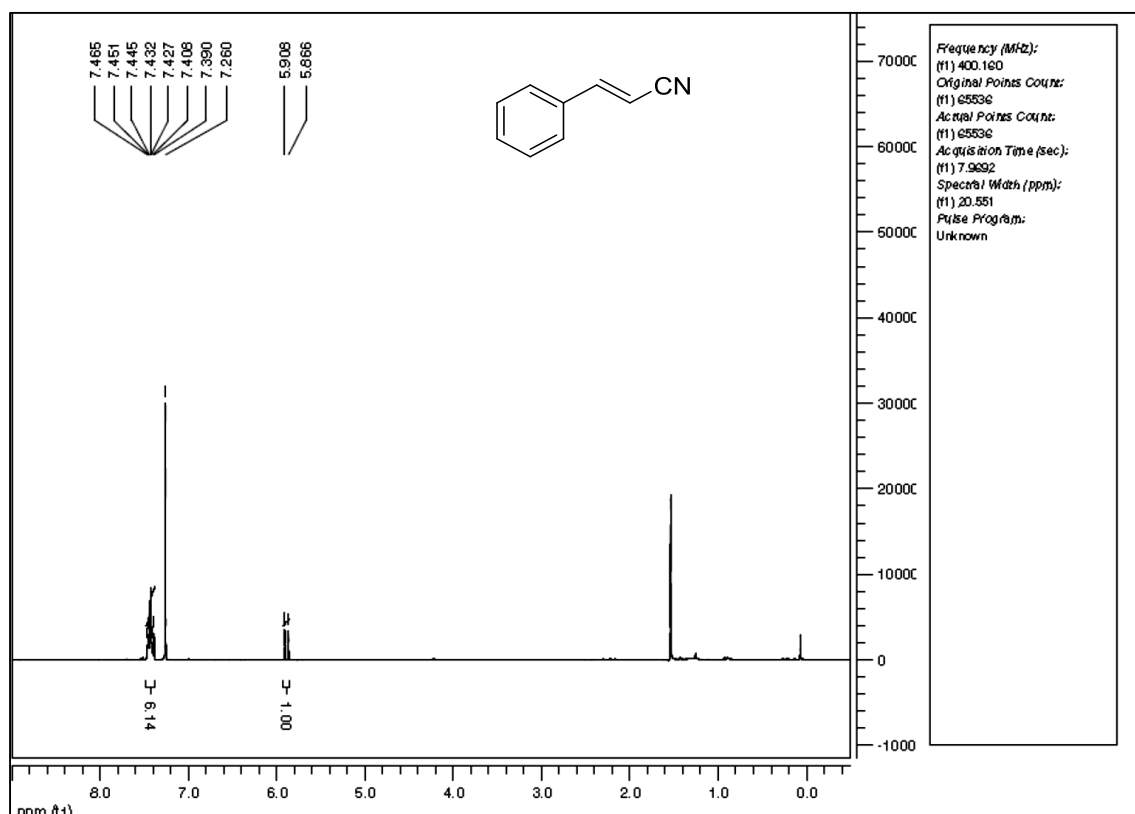

**Figure S36:** <sup>1</sup>H NMR spectrum of cinnamotrile in CDCl<sub>3</sub> recorded at 400MHz.

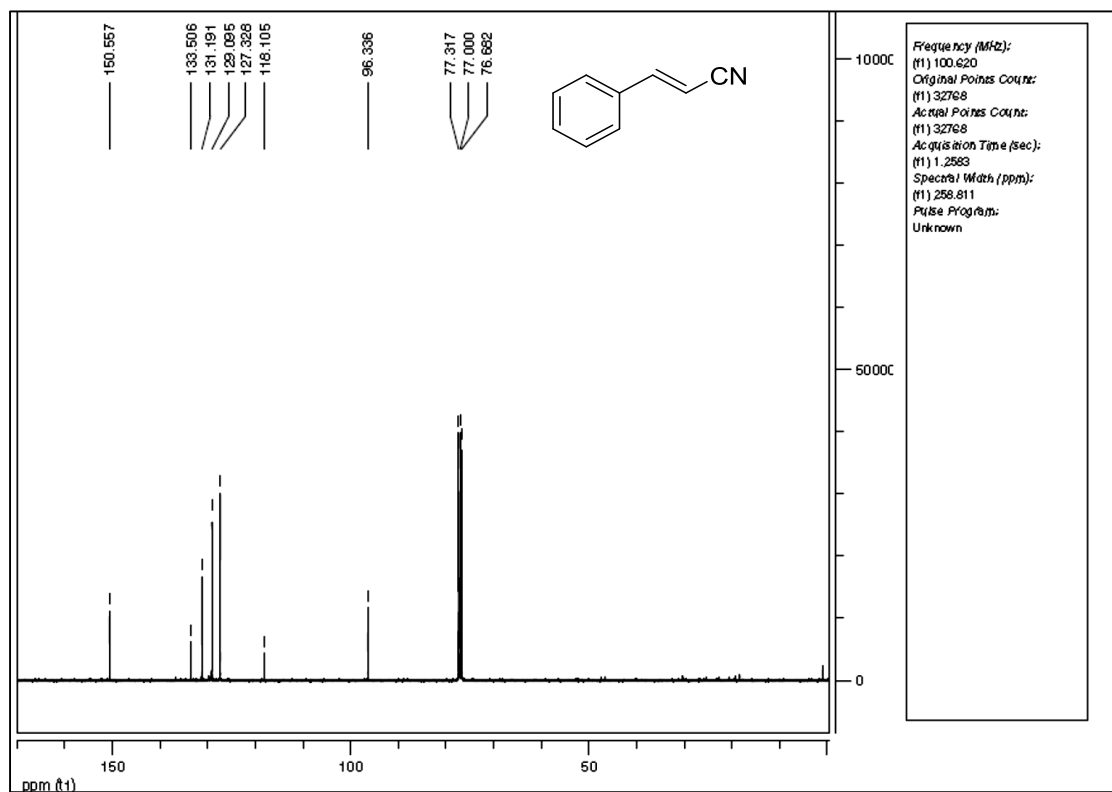

**Figure S37:** <sup>13</sup>C{<sup>1</sup>H} NMR spectrum of cinnamotrile in CDCl<sub>3</sub> recorded at 100 MHz.
